# Supplementary material
Source: publisher figshare collection journal article supplement (https://acs.figshare.com/ndownloader/files/9764614)
Supplement: Supplementary file 1 [file 9764614]

**Supporting Information**  
**Synthesis and Reactivity of a Low-Coordinate Iron(II) Hydride Complex:**  
**Applications in Catalytic Hydrodefluorination**

Nicholas M. Hein, Fraser S. Pick, and Michael D. Fryzuk\*

Department of Chemistry  
The University of British Columbia  
2036 Main Mall  
Vancouver, BC, CANADA  
V6T 1Z1

**Contents:**

|                                                                    |     |
|--------------------------------------------------------------------|-----|
| X-ray Crystallographic Data and Collection Parameters.....         | S2  |
| Solid-State Molecular Structures.....                              | S9  |
| <sup>1</sup> H NMR Characterization for Synthesized Complexes..... | S14 |
| Experimental NMR Spectra.....                                      | S20 |
| Additional Kinetic Data.....                                       | S50 |

## X-ray Crystallographic Data and Collection Parameters

**Table S1:** Crystal data and structure refinement for **2**

|                                         |                                                                |                          |
|-----------------------------------------|----------------------------------------------------------------|--------------------------|
| Identification code                     | mf1263                                                         |                          |
| Empirical formula                       | $C_{38.5}H_{59}FeN_2P$                                         |                          |
| Formula weight                          | 636.69                                                         |                          |
| Temperature                             | 90K                                                            |                          |
| Crystal size                            | $0.46 \times 0.45 \times 0.11 \text{ mm}^3$                    |                          |
| Radiation                               | MoK $\alpha$ ( $\lambda = 0.71073 \text{ \AA}$ )               |                          |
| Crystal system                          | monoclinic                                                     |                          |
| Space group                             | C2/c                                                           |                          |
| Unit cell dimensions                    | $a=27.732(3) \text{ \AA}$                                      | $\alpha=90^\circ$        |
|                                         | $b=14.1554(13) \text{ \AA}$                                    | $\beta=110.078(2)^\circ$ |
|                                         | $c=19.4207(18) \text{ \AA}$                                    | $\gamma=90^\circ$        |
| Volume                                  | $7160.3(11) \text{ \AA}^3$                                     |                          |
| Z                                       | 8                                                              |                          |
| Density (calculated)                    | $1.181 \text{ g/cm}^3$                                         |                          |
| Absorption Coefficient                  | $0.494 \text{ mm}^{-1}$                                        |                          |
| F(000)                                  | 2760.0                                                         |                          |
| 2 $\theta$ range for data collection    | $3.128$ to $60.202^\circ$                                      |                          |
| Index ranges                            | $-35 \leq h \leq 39, -19 \leq k \leq 19, -26 \leq l \leq 27$   |                          |
| Reflections collected                   | 76880                                                          |                          |
| Independent reflections                 | 10512 [ $R_{\text{int}} = 0.0243, R_{\text{sigma}} = 0.0160$ ] |                          |
| Data/restraints/parameters              | 10512/447/455                                                  |                          |
| Completeness to $\theta$                | 99.8%                                                          |                          |
| Goodness-of-fit on $F^2$                | 1.032                                                          |                          |
| Final R indexes [ $I \geq 2\sigma(I)$ ] | $R_1 = 0.0317, wR_2 = 0.0762$                                  |                          |
| Final R indexes [all data]              | $R_1 = 0.0393, wR_2 = 0.0814$                                  |                          |
| Largest diff. peak/hole                 | $0.64/-0.42 \text{ e\AA}^{-3}$                                 |                          |

**Table S2:** Crystal data and structure refinement for **3**

|                                         |                                                                    |                            |
|-----------------------------------------|--------------------------------------------------------------------|----------------------------|
| Identification code                     | mf1206                                                             |                            |
| Empirical formula                       | $C_{39}H_{66}BFeN_2P$                                              |                            |
| Formula weight                          | 660.56                                                             |                            |
| Temperature                             | 90K                                                                |                            |
| Crystal size                            | $0.37 \times 0.21 \times 0.16 \text{ mm}^3$                        |                            |
| Radiation                               | MoK $\alpha$ ( $\lambda = 0.71073 \text{ \AA}$ )                   |                            |
| Crystal system                          | monoclinic                                                         |                            |
| Space group                             | P2 <sub>1</sub> /c                                                 |                            |
| Unit cell dimensions                    | $a=16.9333(7) \text{ \AA}$                                         | $\alpha=90^\circ$          |
|                                         | $b=11.7516(5) \text{ \AA}$                                         | $\beta=100.5590(10)^\circ$ |
|                                         | $c=20.0066(7) \text{ \AA}$                                         | $\gamma=90^\circ$          |
| Volume                                  | $3913.8(3) \text{ \AA}^3$                                          |                            |
| Z                                       | 4                                                                  |                            |
| Density (calculated)                    | $1.121 \text{ g/cm}^3$                                             |                            |
| Absorption Coefficient                  | $0.453 \text{ mm}^{-1}$                                            |                            |
| F(000)                                  | 1440.0                                                             |                            |
| 2 $\theta$ range for data collection    | $4.038$ to $50.136^\circ$                                          |                            |
| Index ranges                            | $-20 \leq h \leq 17$ , $-12 \leq k \leq 14$ , $-23 \leq l \leq 22$ |                            |
| Reflections collected                   | 29547                                                              |                            |
| Independent reflections                 | 6921 [ $R_{\text{int}} = 0.0605$ , $R_{\text{sigma}} = 0.0656$ ]   |                            |
| Data/restraints/parameters              | 6921/0/419                                                         |                            |
| Completeness to $\theta$                | 99.7%                                                              |                            |
| Goodness-of-fit on $F^2$                | 1.011                                                              |                            |
| Final R indexes [ $I \geq 2\sigma(I)$ ] | $R_1 = 0.0501$ , $wR_2 = 0.1034$                                   |                            |
| Final R indexes [all data]              | $R_1 = 0.0810$ , $wR_2 = 0.1146$                                   |                            |
| Largest diff. peak/hole                 | $0.46/-0.49 \text{ e\AA}^{-3}$                                     |                            |

**Table S3:** Crystal data and structure refinement for **4**

|                                         |                                                                    |                   |
|-----------------------------------------|--------------------------------------------------------------------|-------------------|
| Identification code                     | mf1296                                                             |                   |
| Empirical formula                       | $C_{37}H_{56.67}FeN_2P$                                            |                   |
| Formula weight                          | 616.33                                                             |                   |
| Temperature                             | 90K                                                                |                   |
| Crystal size                            | $0.75 \times 0.75 \times 0.55 \text{ mm}^3$                        |                   |
| Radiation                               | MoK $\alpha$ ( $\lambda = 0.71073 \text{ \AA}$ )                   |                   |
| Crystal system                          | Orthorhombic                                                       |                   |
| Space group                             | Pbca                                                               |                   |
| Unit cell dimensions                    | $a=19.4365(19) \text{ \AA}$                                        | $\alpha=90^\circ$ |
|                                         | $b=17.908(2) \text{ \AA}$                                          | $\beta=90^\circ$  |
|                                         | $c=19.954(2) \text{ \AA}$                                          | $\gamma=90^\circ$ |
| Volume                                  | $6945.5(13) \text{ \AA}^3$                                         |                   |
| Z                                       | 8                                                                  |                   |
| Density (calculated)                    | $1.179 \text{ g/cm}^3$                                             |                   |
| Absorption Coefficient                  | $0.507 \text{ mm}^{-1}$                                            |                   |
| F(000)                                  | 2669.0                                                             |                   |
| 2 $\theta$ range for data collection    | $3.706$ to $59.222^\circ$                                          |                   |
| Index ranges                            | $-27 \leq h \leq 26$ , $-24 \leq k \leq 23$ , $-27 \leq l \leq 27$ |                   |
| Reflections collected                   | 76719                                                              |                   |
| Independent reflections                 | 9766 [ $R_{\text{int}} = 0.0354$ , $R_{\text{sigma}} = 0.0205$ ]   |                   |
| Data/restraints/parameters              | 9766/0/436                                                         |                   |
| Completeness to $\theta$                | 99.9%                                                              |                   |
| Goodness-of-fit on $F^2$                | 1.027                                                              |                   |
| Final R indexes [ $I \geq 2\sigma(I)$ ] | $R_1 = 0.0309$ , $wR_2 = 0.0840$                                   |                   |
| Final R indexes [all data]              | $R_1 = 0.0379$ , $wR_2 = 0.0889$                                   |                   |
| Largest diff. peak/hole                 | $0.42/-0.30 \text{ e\AA}^{-3}$                                     |                   |

**Table S4:** Crystal data and structure refinement for **5**

|                                         |                                                                |                   |
|-----------------------------------------|----------------------------------------------------------------|-------------------|
| Identification code                     | mf1307                                                         |                   |
| Empirical formula                       | $C_{47}H_{65}FeN_4P$                                           |                   |
| Formula weight                          | 772.85                                                         |                   |
| Temperature                             | 90K                                                            |                   |
| Crystal size                            | $0.28 \times 0.16 \times 0.16 \text{ mm}^3$                    |                   |
| Radiation                               | MoK $\alpha$ ( $\lambda = 0.71073 \text{ \AA}$ )               |                   |
| Crystal system                          | Orthorhombic                                                   |                   |
| Space group                             | P2 <sub>1</sub> 2 <sub>1</sub> 2 <sub>1</sub>                  |                   |
| Unit cell dimensions                    | a=11.4731(10) $\text{\AA}$                                     | $\alpha=90^\circ$ |
|                                         | b=19.0046(18) $\text{\AA}$                                     | $\beta=90^\circ$  |
|                                         | c=20.1296(17) $\text{\AA}$                                     | $\gamma=90^\circ$ |
| Volume                                  | 4389.1(7) $\text{\AA}^3$                                       |                   |
| Z                                       | 4                                                              |                   |
| Density (calculated)                    | 1.170 g/cm <sup>3</sup>                                        |                   |
| Absorption Coefficient                  | 0.416 mm <sup>-1</sup>                                         |                   |
| F(000)                                  | 1664.0                                                         |                   |
| 2 $\theta$ range for data collection    | 4.086 to 55.73°                                                |                   |
| Index ranges                            | $-14 \leq h \leq 14, -24 \leq k \leq 24, -26 \leq l \leq 26$   |                   |
| Reflections collected                   | 64774                                                          |                   |
| Independent reflections                 | 10218 [ $R_{\text{int}} = 0.0931, R_{\text{sigma}} = 0.0757$ ] |                   |
| Data/restraints/parameters              | 10218/0/490                                                    |                   |
| Completeness to $\theta$                | 98.1%                                                          |                   |
| Goodness-of-fit on $F^2$                | 1.015                                                          |                   |
| Final R indexes [ $I \geq 2\sigma(I)$ ] | $R_1 = 0.0535, wR_2 = 0.1355$                                  |                   |
| Final R indexes [all data]              | $R_1 = 0.0643, wR_2 = 0.1405$                                  |                   |
| Largest diff. peak/hole                 | 0.68/-0.32 e $\text{\AA}^{-3}$                                 |                   |

**Table S5:** Crystal data and structure refinement for **6**

|                                         |                                                                    |                           |
|-----------------------------------------|--------------------------------------------------------------------|---------------------------|
| Identification code                     | mf1302                                                             |                           |
| Empirical formula                       | $C_{41}H_{65}FeN_2P$                                               |                           |
| Formula weight                          | 672.77                                                             |                           |
| Temperature                             | 90K                                                                |                           |
| Crystal size                            | $0.42 \times 0.34 \times 0.33 \text{ mm}^3$                        |                           |
| Radiation                               | MoK $\alpha$ ( $\lambda = 0.71073 \text{ \AA}$ )                   |                           |
| Crystal system                          | Triclinic                                                          |                           |
| Space group                             | P-1                                                                |                           |
| Unit cell dimensions                    | $a=10.5433(8) \text{ \AA}$                                         | $\alpha=95.482(4)^\circ$  |
|                                         | $b=11.8988(9) \text{ \AA}$                                         | $\beta=100.646(4)^\circ$  |
|                                         | $c=16.9020(12) \text{ \AA}$                                        | $\gamma=108.968(4)^\circ$ |
| Volume                                  | $1942.9(3) \text{ \AA}^3$                                          |                           |
| Z                                       | 2                                                                  |                           |
| Density (calculated)                    | $1.150 \text{ g/cm}^3$                                             |                           |
| Absorption Coefficient                  | $0.458 \text{ mm}^{-1}$                                            |                           |
| F(000)                                  | 732.0                                                              |                           |
| 2 $\theta$ range for data collection    | $3.672$ to $55.088^\circ$                                          |                           |
| Index ranges                            | $-13 \leq h \leq 13$ , $-15 \leq k \leq 15$ , $-21 \leq l \leq 21$ |                           |
| Reflections collected                   | 34076                                                              |                           |
| Independent reflections                 | 8917 [ $R_{\text{int}} = 0.0423$ , $R_{\text{sigma}} = 0.0403$ ]   |                           |
| Data/restraints/parameters              | 8917/0/420                                                         |                           |
| Completeness to $\theta$                | 99.9%                                                              |                           |
| Goodness-of-fit on $F^2$                | 1.051                                                              |                           |
| Final R indexes [ $I \geq 2\sigma(I)$ ] | $R_1 = 0.0443$ , $wR_2 = 0.1188$                                   |                           |
| Final R indexes [all data]              | $R_1 = 0.0575$ , $wR_2 = 0.1277$                                   |                           |
| Largest diff. peak/hole                 | $0.88/-0.54 \text{ e\AA}^{-3}$                                     |                           |

**Table S6:** Crystal data and structure refinement for **7**

|                                         |                                                                   |                         |
|-----------------------------------------|-------------------------------------------------------------------|-------------------------|
| Identification code                     | mf1214                                                            |                         |
| Empirical formula                       | $C_{32.33}H_{49.33}Fe_{0.67}N_{3.33}P_{0.67}$                     |                         |
| Formula weight                          | 542.63                                                            |                         |
| Temperature                             | 100K                                                              |                         |
| Crystal size                            | $0.3 \times 0.17 \times 0.07 \text{ mm}^3$                        |                         |
| Radiation                               | MoK $\alpha$ ( $\lambda = 0.71073 \text{ \AA}$ )                  |                         |
| Crystal system                          | Monoclinic                                                        |                         |
| Space group                             | P2 <sub>1</sub> /n                                                |                         |
| Unit cell dimensions                    | $a=10.4848(10) \text{ \AA}$                                       | $\alpha=90^\circ$       |
|                                         | $b=24.631(3) \text{ \AA}$                                         | $\beta=98.444(4)^\circ$ |
|                                         | $c=17.7095(19) \text{ \AA}$                                       | $\gamma=90^\circ$       |
| Volume                                  | $4523.9(8) \text{ \AA}^3$                                         |                         |
| Z                                       | 6                                                                 |                         |
| Density (calculated)                    | $1.195 \text{ g/cm}^3$                                            |                         |
| Absorption Coefficient                  | $0.407 \text{ mm}^{-1}$                                           |                         |
| F(000)                                  | 1764.0                                                            |                         |
| 2 $\theta$ range for data collection    | $4.26$ to $53.61^\circ$                                           |                         |
| Index ranges                            | $-13 \leq h \leq 9$ , $-31 \leq k \leq 30$ , $-22 \leq l \leq 18$ |                         |
| Reflections collected                   | 28699                                                             |                         |
| Independent reflections                 | 9560 [ $R_{\text{int}} = 0.0604$ , $R_{\text{sigma}} = 0.0799$ ]  |                         |
| Data/restraints/parameters              | 9560/0/531                                                        |                         |
| Completeness to $\theta$                | 98.7%                                                             |                         |
| Goodness-of-fit on $F^2$                | 1.052                                                             |                         |
| Final R indexes [ $I \geq 2\sigma(I)$ ] | $R_1 = 0.0452$ , $wR_2 = 0.1076$                                  |                         |
| Final R indexes [all data]              | $R_1 = 0.0716$ , $wR_2 = 0.1177$                                  |                         |
| Largest diff. peak/hole                 | $0.48/-0.34 \text{ e\AA}^{-3}$                                    |                         |

**Table S7:** Crystal data and structure refinement for **8**

|                                         |                                                          |                         |
|-----------------------------------------|----------------------------------------------------------|-------------------------|
| Identification code                     | mf1248_sq                                                |                         |
| Empirical formula                       | $C_{73.5}H_{112}F_2Fe_2N_4P_2$                           |                         |
| Formula weight                          | 1263.30                                                  |                         |
| Temperature                             | 90K                                                      |                         |
| Crystal size                            | $0.14 \times 0.12 \times 0.06 \text{ mm}^3$              |                         |
| Radiation                               | MoK $\alpha$ ( $\lambda = 0.71073 \text{ \AA}$ )         |                         |
| Crystal system                          | Monoclinic                                               |                         |
| Space group                             | $P2_1/c$                                                 |                         |
| Unit cell dimensions                    | $a=20.445(6) \text{ \AA}$                                | $\alpha=90^\circ$       |
|                                         | $b=13.612(4) \text{ \AA}$                                | $\beta=92.564(9)^\circ$ |
|                                         | $c=26.186(9) \text{ \AA}$                                | $\gamma=90^\circ$       |
| Volume                                  | $7280(4) \text{ \AA}^3$                                  |                         |
| Z                                       | 4                                                        |                         |
| Density (calculated)                    | $1.153 \text{ g/cm}^3$                                   |                         |
| Absorption Coefficient                  | $0.489 \text{ mm}^{-1}$                                  |                         |
| F(000)                                  | 2724.0                                                   |                         |
| 2 $\theta$ range for data collection    | $1.994$ to $44.786^\circ$                                |                         |
| Index ranges                            | $-21 \leq h \leq 21, 0 \leq k \leq 14, 0 \leq l \leq 28$ |                         |
| Reflections collected                   | 9266                                                     |                         |
| Independent reflections                 | 9266 [ $R_{\text{sigma}} = 0.1002$ ]                     |                         |
| Data/restraints/parameters              | 9266/735/802                                             |                         |
| Completeness to $\theta$                | 97.9%                                                    |                         |
| Goodness-of-fit on $F^2$                | 1.031                                                    |                         |
| Final R indexes [ $I \geq 2\sigma(I)$ ] | $R_1 = 0.0613, wR_2 = 0.1311$                            |                         |
| Final R indexes [all data]              | $R_1 = 0.0948, wR_2 = 0.1454$                            |                         |
| Largest diff. peak/hole                 | $0.53/-0.48 \text{ e\AA}^{-3}$                           |                         |

## Solid State Molecular Structures

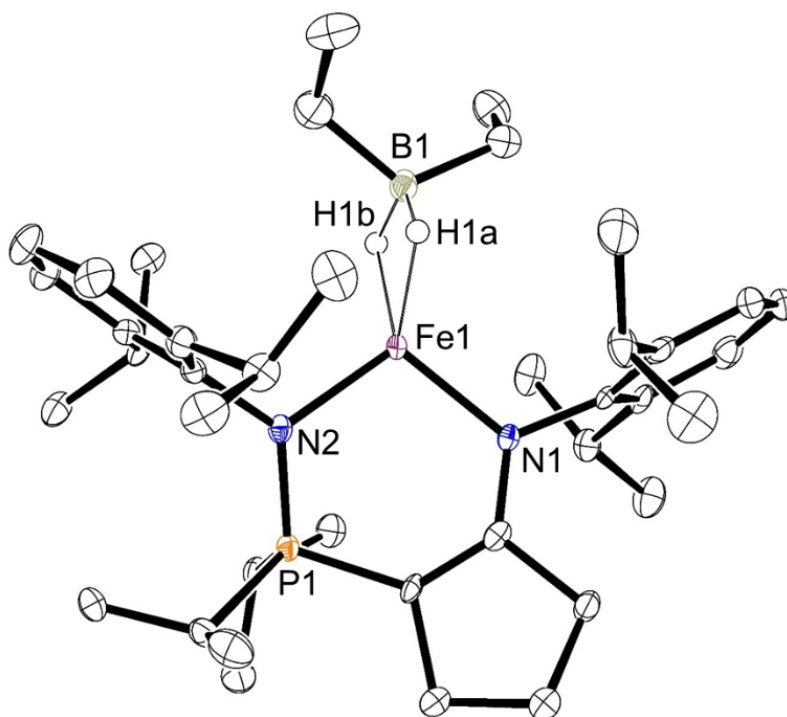

**Figure S1:** ORTEP drawing of the solid-state molecular structure of **3** (ellipsoids at 50% probability level). All hydrogen atoms except those bonded to iron have been omitted for clarity. Selected bond lengths (Å) and angles (deg): Fe1-N1: 1.952(2), Fe1-N2: 1.971(2), P1-N2: 1.632(2), Fe1-H1a: 1.81(3), Fe1-H1b: 1.66(3), N1-Fe1-N2: 105.26(9), and H1a-Fe1-H1b: 59.8(14).

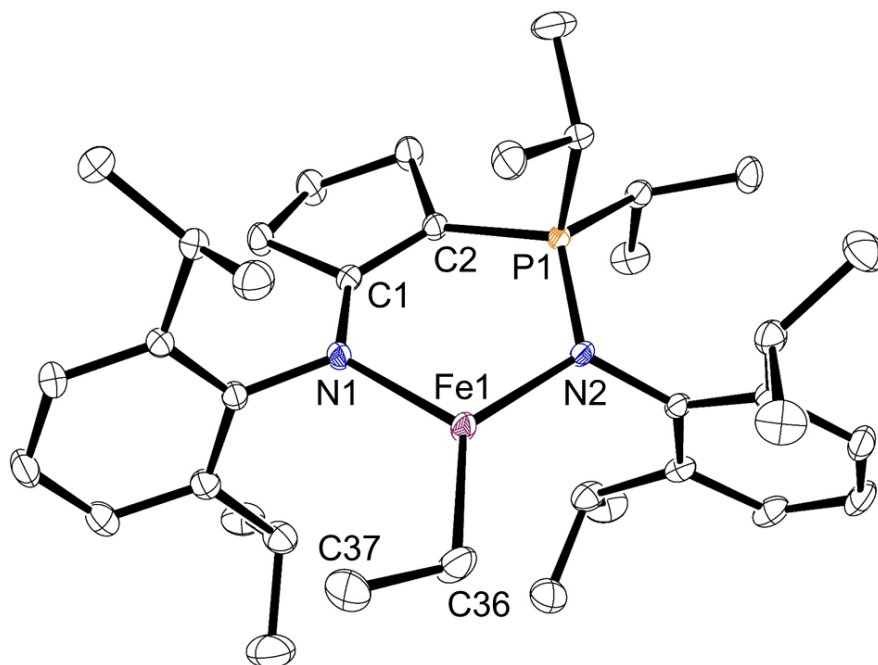

**Figure S2:** ORTEP drawing of the solid-state molecular structure of **4** (ellipsoids at 50% probability level). All hydrogen atoms have been omitted for clarity. Selected bond lengths (Å) and angles (deg): Fe1-N1: 1.9860(10), Fe1-N2: 2.0072(9), C1-N1: 1.3524(14), C1-C2: 1.3853(15), C2-P1: 1.7564(11), P1-N2: 1.6314(9), Fe1-C36: 2.052(5), C36-C37: 1.481(10), N1-Fe1-N2: 103.44(4), and C37-C36-Fe1: 116.9(4).

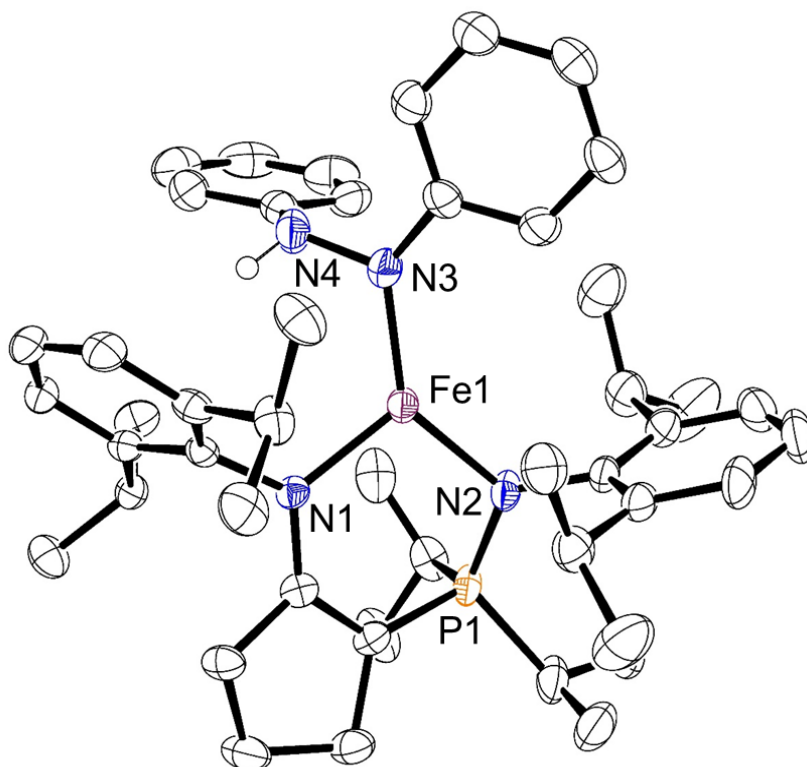

**Figure S3:** ORTEP drawing of the solid-state molecular structure of **5** (ellipsoids at 50% probability level). All hydrogen atoms except those bonded to N have been omitted for clarity. Selected bond lengths (Å) and angles (deg): Fe1-N1: 1.973(3), Fe1-N2: 1.990(3), N3-N4: 1.429(5), Fe1-N3: 1.934(3), P1-N2: 1.644(4), N1-Fe1-N2: 104.46(14), and Fe1-N3-N4: 115.7(3).

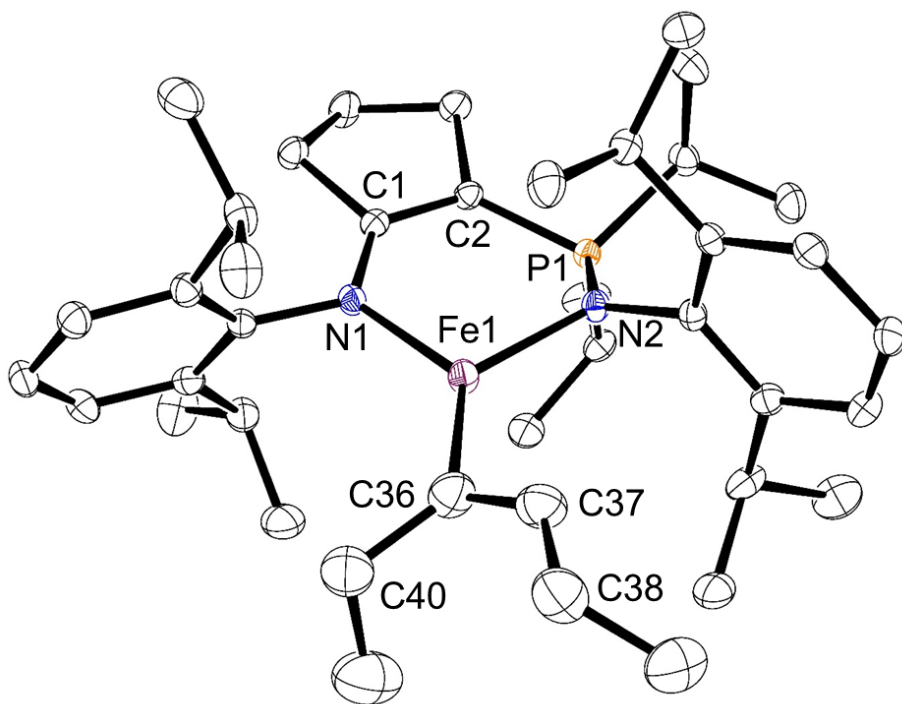

**Figure S4:** ORTEP drawing of the solid-state molecular structure of **6** (ellipsoids at 50% probability level). All hydrogen atoms have been omitted for clarity. Selected bond lengths (Å) and angles (deg): Fe1-N1: 1.9807(16), Fe1-N2: 2.0081(16), Fe1-C36: 2.016(2), C1-C2: 1.387(3), C1-N1: 1.355(2), C2-P1: 1.7605(19), P1-N2: 1.6295(16), C36-C40: 1.526(4), C36-C37: 1.369(4), C37-C38: 1.502(3), N1-Fe1-N2: 102.02(6), C36-Fe1-N1: 130.40(8), C36-Fe1-N2: 127.31(9), and C40-C36-C37: 120.0(2).

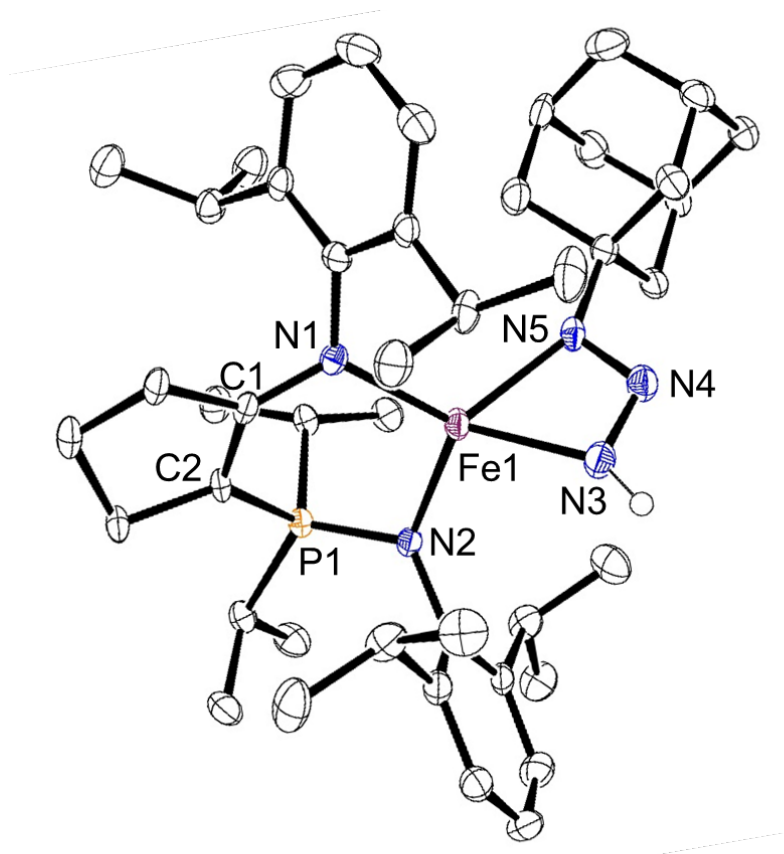

**Figure S5:** ORTEP drawing of the solid-state molecular structure of **7** (ellipsoids at 50% probability level). All hydrogen atoms except those bonded to N have been omitted for clarity. Selected bond lengths (Å) and angles (deg): Fe1-N1: 2.0170(16), Fe1-N2: 2.0273(17), C1-C2: 1.376(3), C1-N1: 1.369(2), C2-P1: 1.770(2), P1-N2: 1.6263(16), Fe1-N3: 2.1060(17), Fe1-N5: 2.0901(17), N3-N4: 1.321(3), N4-N5: 1.296(2), N1-Fe1-N2: 104.95(7), N3-Fe1-N5: 60.30(7), and N3-N4-N5: 107.26(16).

## $^1\text{H}$ NMR Characterization for Synthesized Complexes

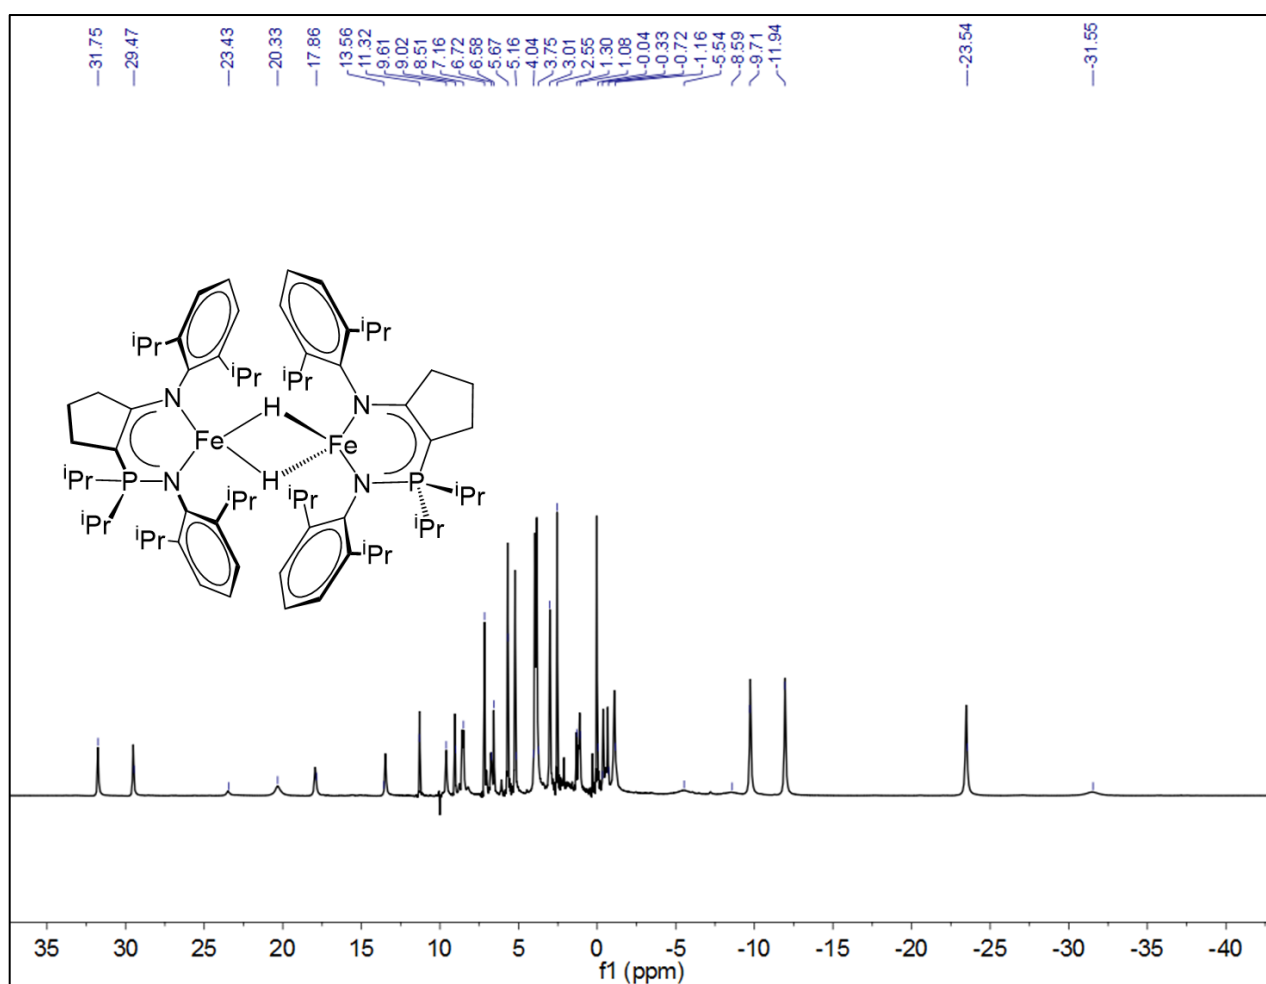

**Figure S6:**  $^1\text{H}$  NMR spectrum for  $[(^{\text{CY5}}\text{NpN}^{\text{DIPP,DIPP}})\text{FeH}]_2$  **2** (400 MHz,  $d_6$ -benzene, 25 °C).

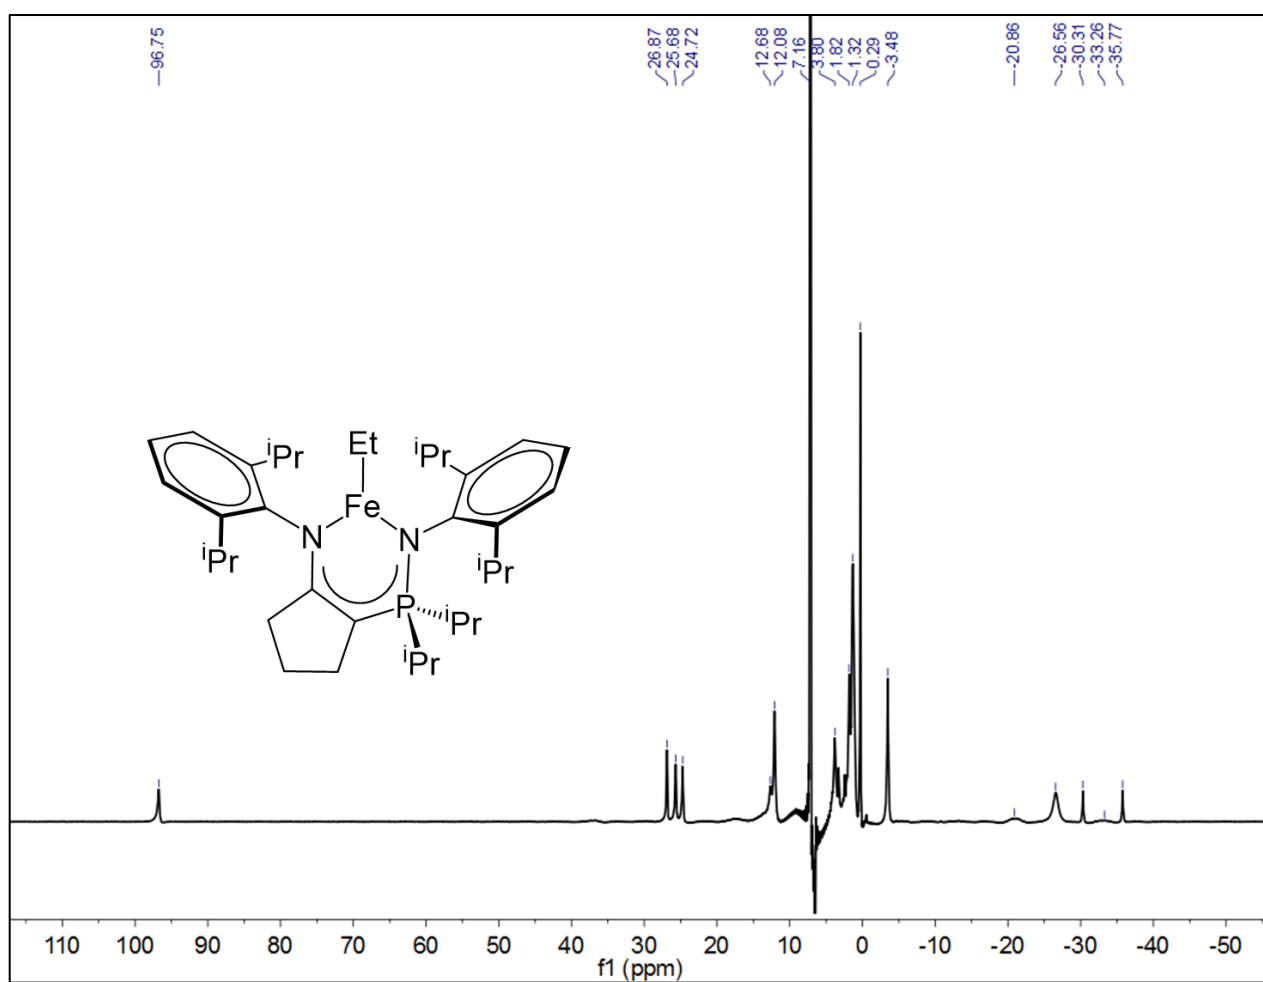

**Figure S7:**  $^1\text{H}$  NMR spectrum for  $(^{\text{CY5}}\text{NpN}^{\text{DIPP,DIPP}})\text{FeEt}$  4 (300 MHz,  $d_6$ -benzene, 25 °C).



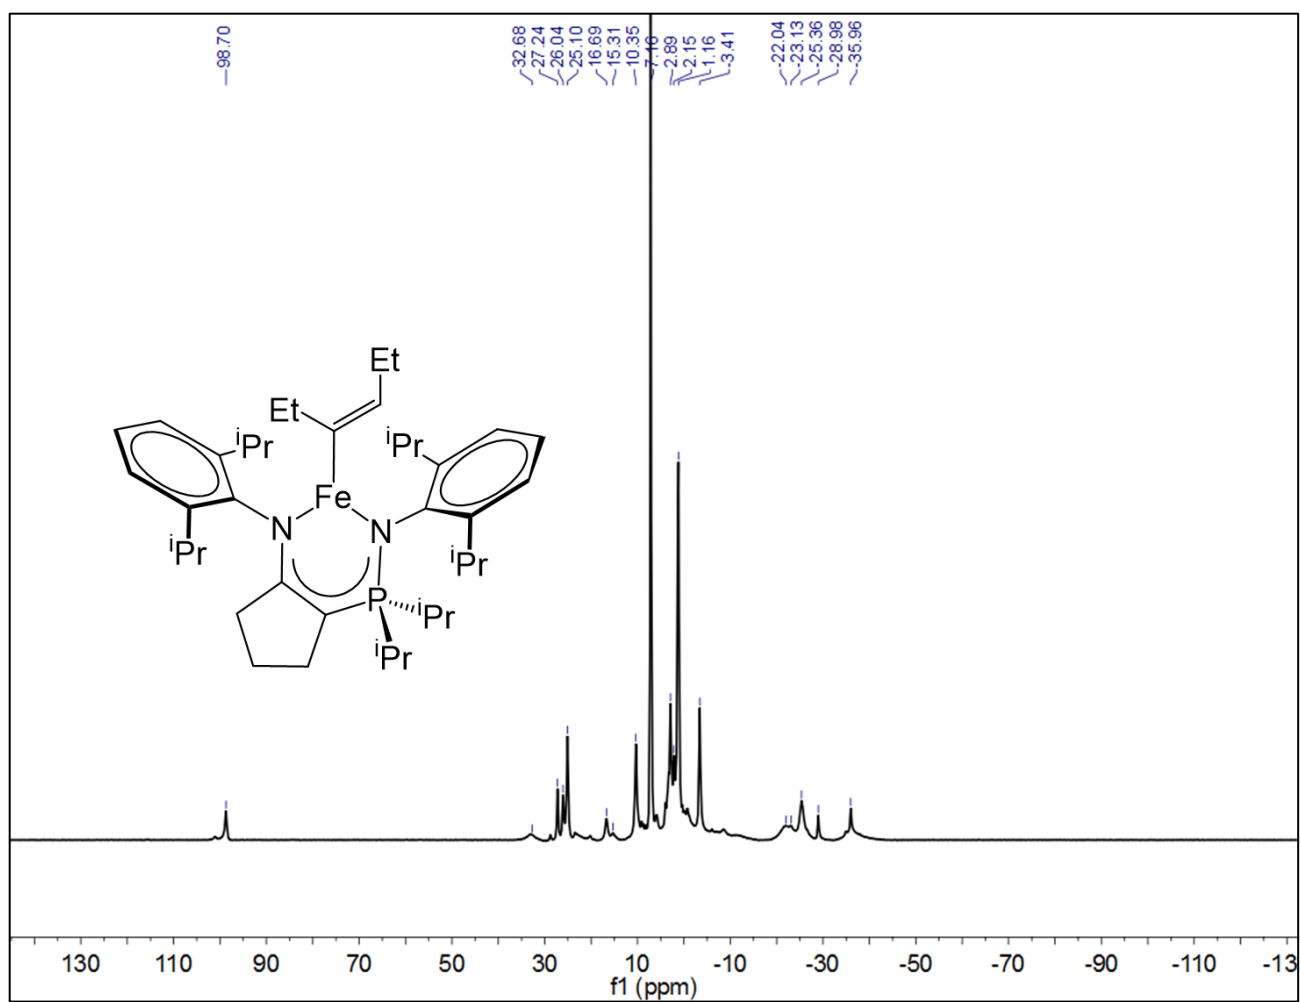

**Figure S9:**  $^1\text{H}$  NMR spectrum for  $(\text{CY}^5\text{NpN}^{\text{DIPP,DIPP}})\text{Fe}(\text{3-hexene})$  6 (300 MHz,  $d_6$ -benzene, 25 °C).

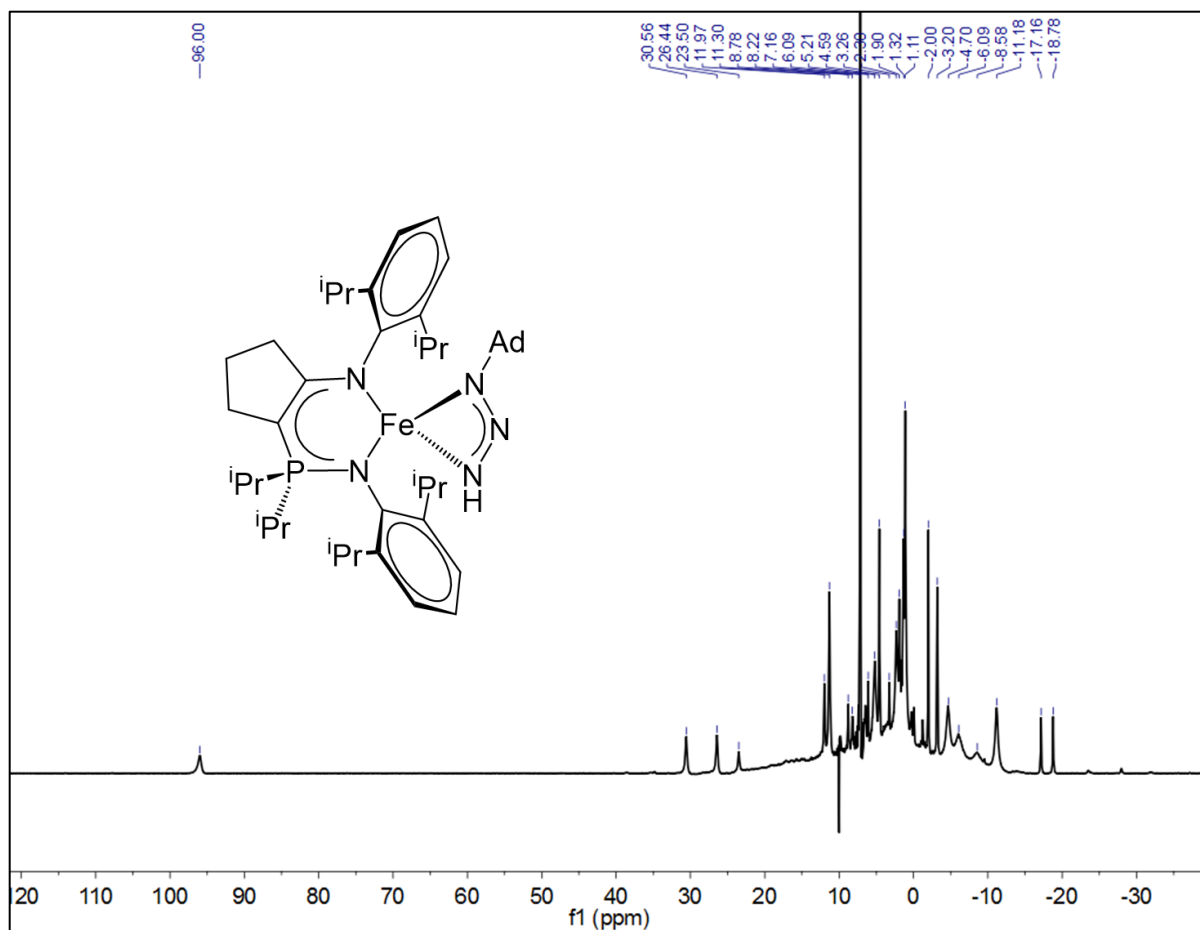

**Figure S10:**  $^1H$  NMR spectrum for  $(^{CY5}NpN^{DIPP,DIPP})Fe(\eta^2-HNNAAd)$  7 (400 MHz,  $d_6$ -benzene, 25 °C).

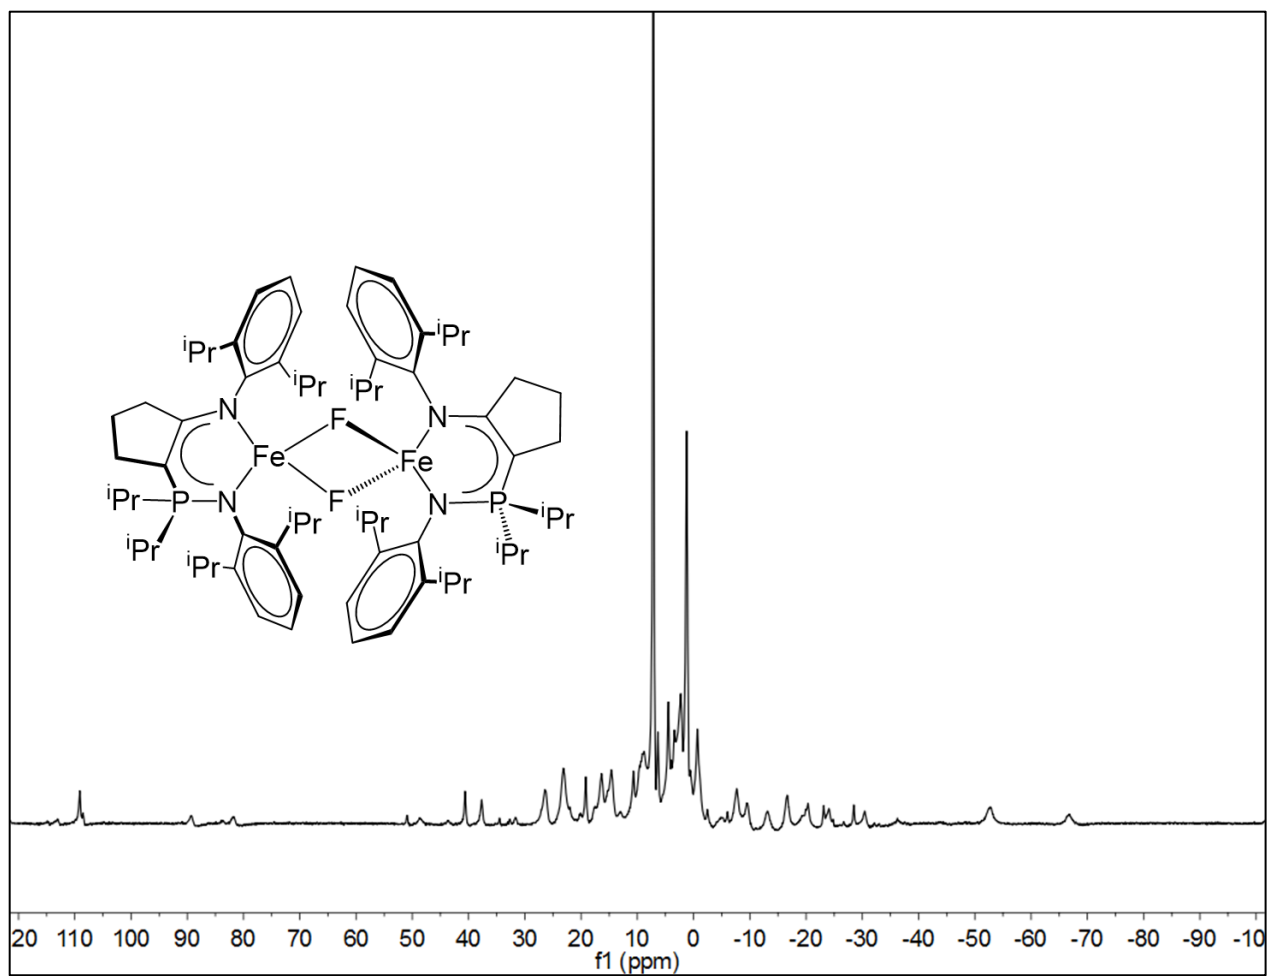

**Figure S11:**  $^1\text{H}$  NMR spectrum for  $[(^{\text{CY5}}\text{NpN}^{\text{DIPP,DIPP}})\text{FeF}]_2$  **8** (300 MHz,  $d_6$ -benzene, 25 °C).

### Experimental NMR Spectra

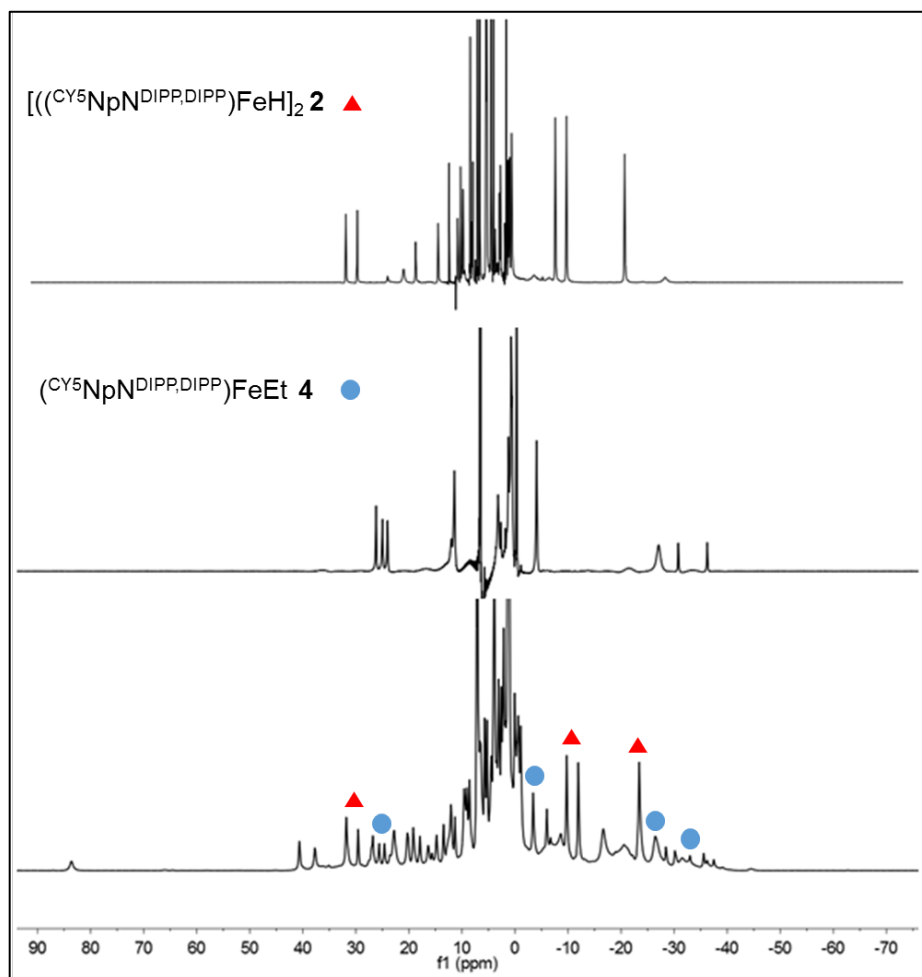

**Figure S12:**  $^1\text{H}$  NMR spectra for  $[(\text{CY}^5\text{NpN}^{\text{DIPP,DIPP}})\text{FeH}]_2 \mathbf{2}$  (top),  $(\text{CY}^5\text{NpN}^{\text{DIPP,DIPP}})\text{FeEt} \mathbf{4}$  (middle), and the product mixture from which single crystals of  $(\text{CY}^5\text{NpN}^{\text{DIPP,DIPP}})\text{FeH}_2\text{BEt}_2 \mathbf{3}$  were grown (bottom). Red triangles for  $\mathbf{2}$  and blue circles for  $\mathbf{4}$  are used to mark easily discernable signals belonging to their respective compounds in the complicated product mixture shown in the bottom spectrum. All spectra recorded at 300 MHz in  $d_6$ -benzene at 25 °C.

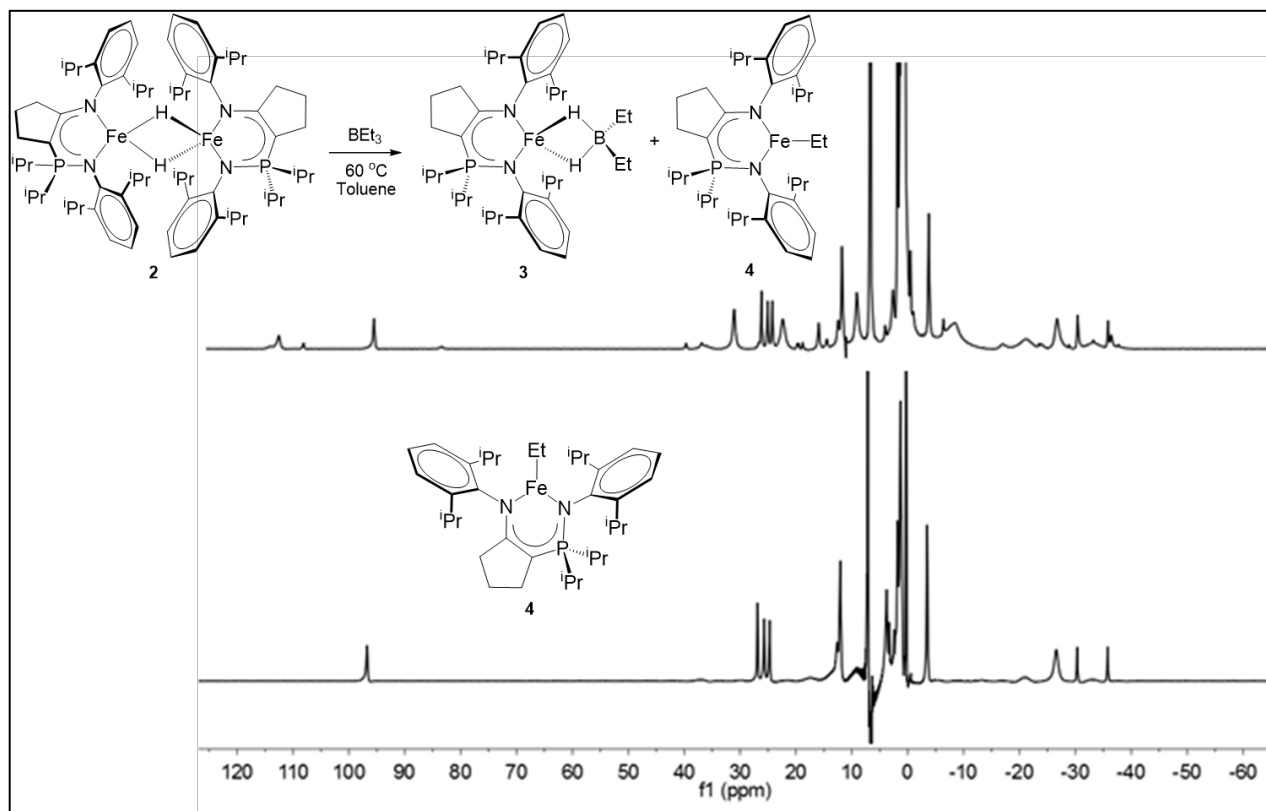

**Figure S13:**  $^1\text{H}$  NMR spectra for the reaction of **2** with  $\text{BEt}_3$  at  $60^\circ\text{C}$  for 2h (top spectrum, 300 MHz,  $d_8$ -toluene,  $25^\circ\text{C}$ ), and for complex **4** (bottom spectrum, 300 MHz,  $d_6$ -benzene,  $25^\circ\text{C}$ ).

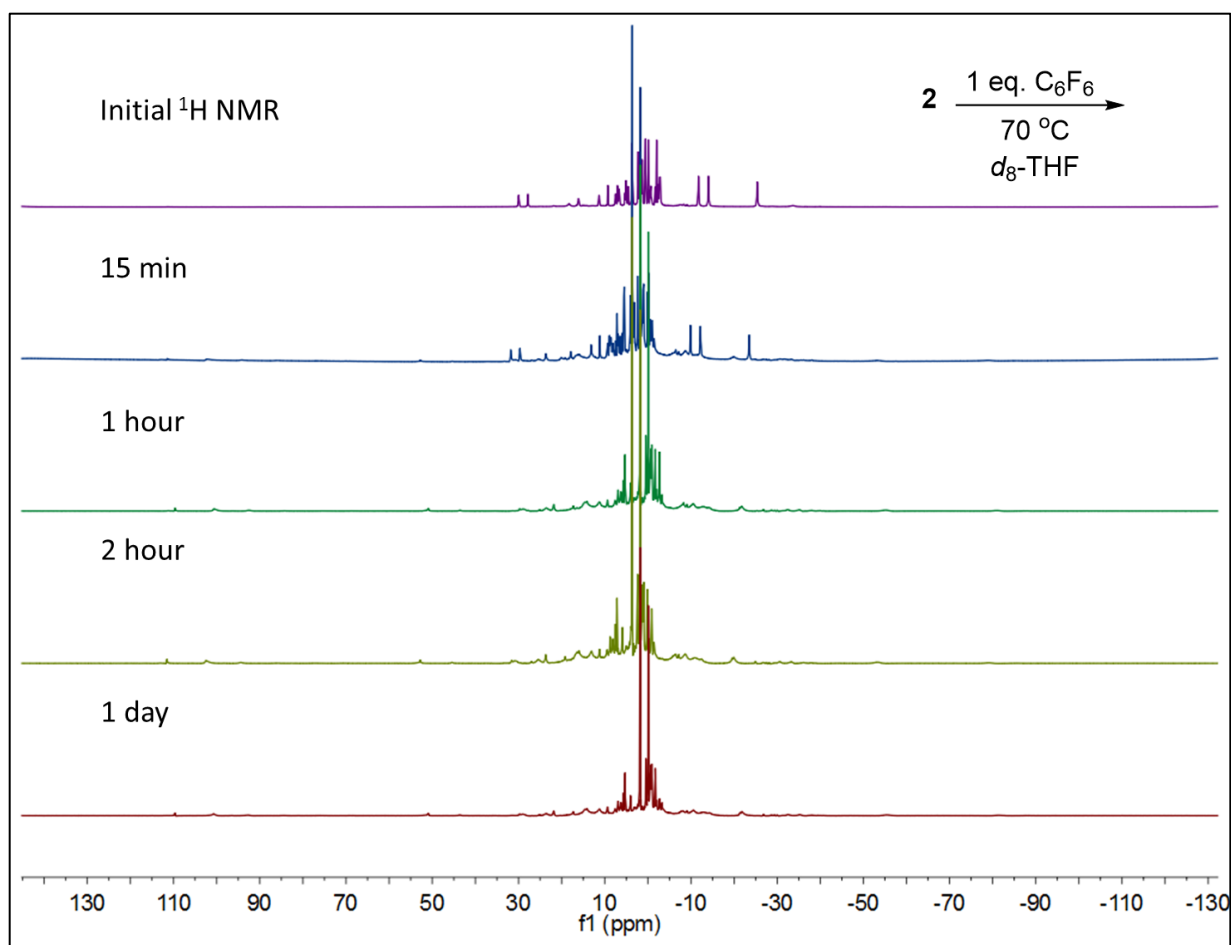

**Figure S14:**  $^1\text{H}$  NMR spectra for the stoichiometric reaction of **2** with  $\text{C}_6\text{F}_6$  at  $70\text{ }^\circ\text{C}$  in  $d_8\text{-THF}$ .  $^1\text{H}$  NMR spectra were collected after 15 minutes, 1 hour, 2 hours, and 1 day. All spectra were collected in  $d_8\text{-THF}$  at 300 MHz at  $25\text{ }^\circ\text{C}$ .

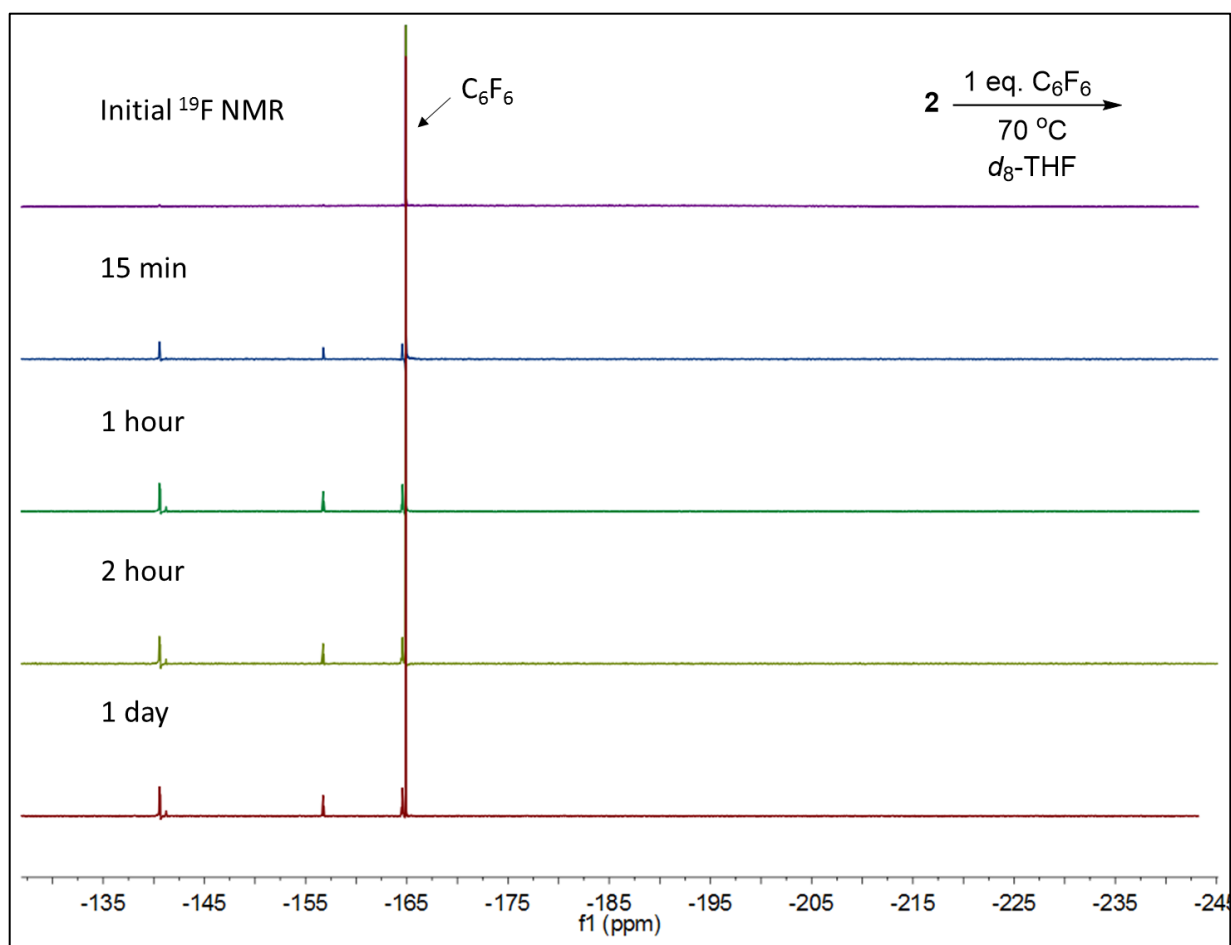

**Figure S15:**  $^{19}\text{F}$  NMR spectra for the stoichiometric reaction of **2** with  $\text{C}_6\text{F}_6$  at  $70\text{ }^\circ\text{C}$  in  $d_8\text{-THF}$ .  $^{19}\text{F}$  NMR spectra were collected after 15 minutes, 1 hour, 2 hours, and 1 day. All spectra were collected in  $d_8\text{-THF}$  at 282 MHz at  $25\text{ }^\circ\text{C}$ .

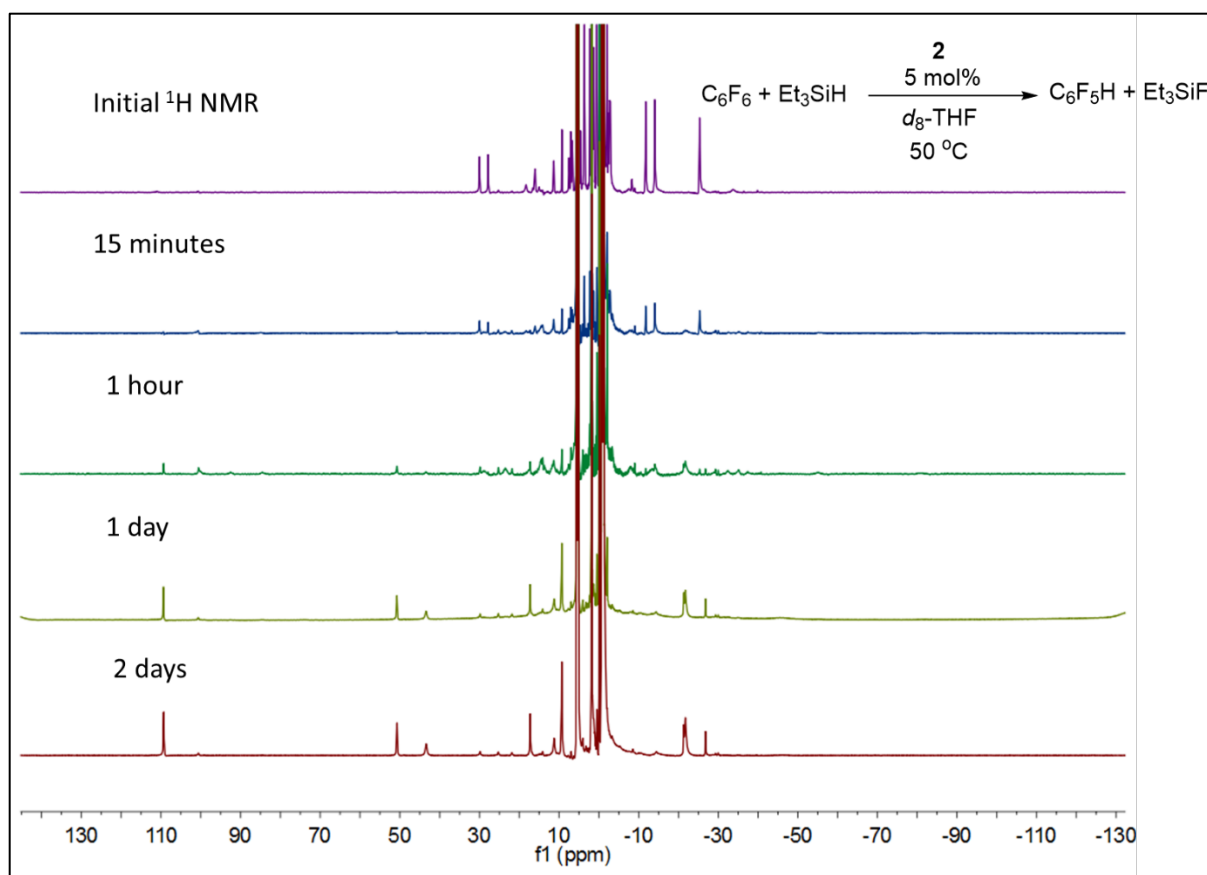

**Figure S16:** Stacked  $^1\text{H}$  NMR spectra for the catalytic monodefluorination of  $\text{C}_6\text{F}_6$  in the presence of  $\text{Et}_3\text{SiH}$  using **2** as the catalyst at  $50^\circ\text{C}$  in  $d_8\text{-THF}$ . It can be seen that the bridging hydride species **2** is completely consumed after allowing the reaction to proceed for 1 hour. A new paramagnetic species is formed, which is the resting state of the catalyst. All spectra collected in  $d_8\text{-THF}$  at 300 MHz at  $25^\circ\text{C}$ .

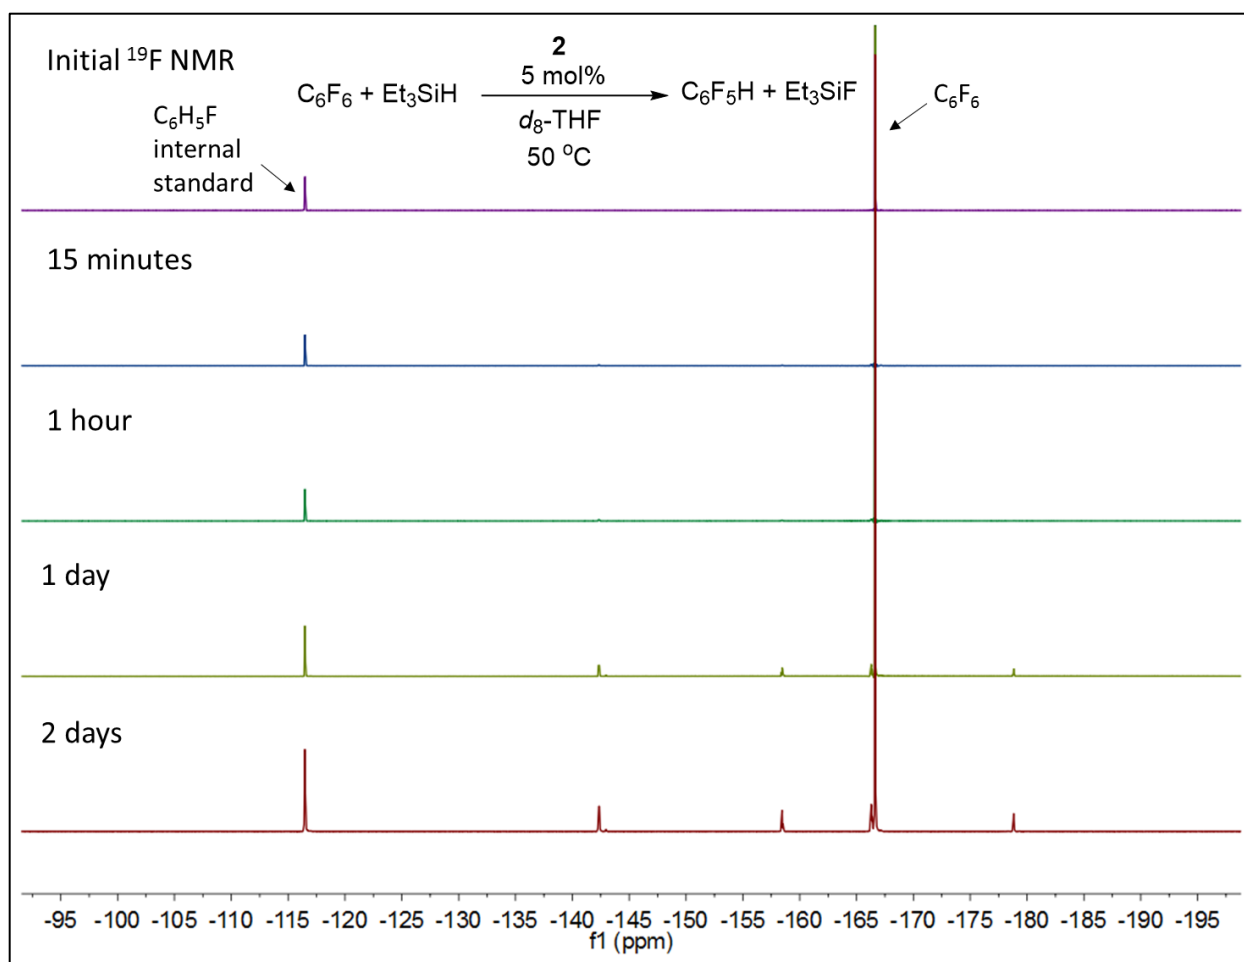

**Figure S17:** Stacked  $^{19}\text{F}$  NMR spectra for the catalytic monodefluorination of  $\text{C}_6\text{F}_6$  in the presence of  $\text{Et}_3\text{SiH}$  using **2** as the catalyst at  $50\text{ }^\circ\text{C}$  in  $d_8\text{-THF}$ . Fluorobenzene ( $\text{C}_6\text{H}_5\text{F}$ ) is used as the internal standard.  $^{19}\text{F}$  resonances corresponding to pentafluorobenzene ( $\text{C}_6\text{F}_5\text{H}$ ) at  $\delta$  - 139.0, - 155.1, and -163.0 and fluorotriethylsilane at  $\delta$  -175.5 are observed after 1 day of reactivity. All spectra collected in  $d_8\text{-THF}$  at 282 MHz at  $25\text{ }^\circ\text{C}$ .

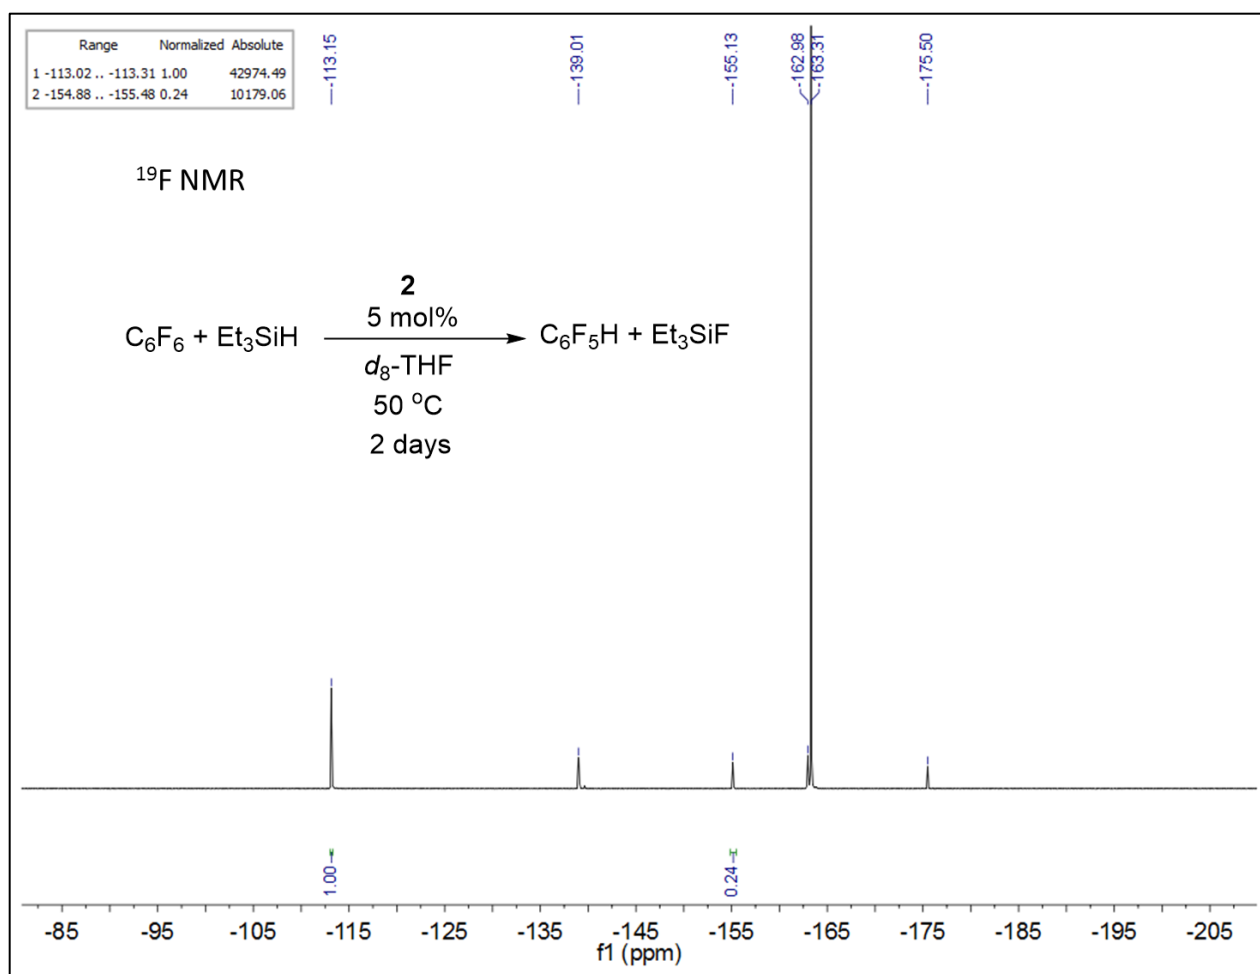

**Figure S18:** <sup>19</sup>F NMR spectrum for the final time point at 2 days for the catalytic monodefluorination of C<sub>6</sub>F<sub>6</sub> in the presence of Et<sub>3</sub>SiH using **2** as the catalyst at 50 °C in *d*<sub>8</sub>-THF. A stoichiometric amount of fluorobenzene (C<sub>6</sub>H<sub>5</sub>F) relative to the initial C<sub>6</sub>F<sub>6</sub> and Et<sub>3</sub>SiH was used as the internal standard (0.219 M, 0.169 mmol). The <sup>19</sup>F resonance corresponding to the *para* position of pentafluorobenzene (C<sub>6</sub>F<sub>5</sub>H) at δ -155.1 was used for integration purposes (TON=4.2). A relaxation delay of 50 seconds was used between scans in the <sup>19</sup>F NMR experiment (282 MHz, *d*<sub>8</sub>-THF, 25 °C).

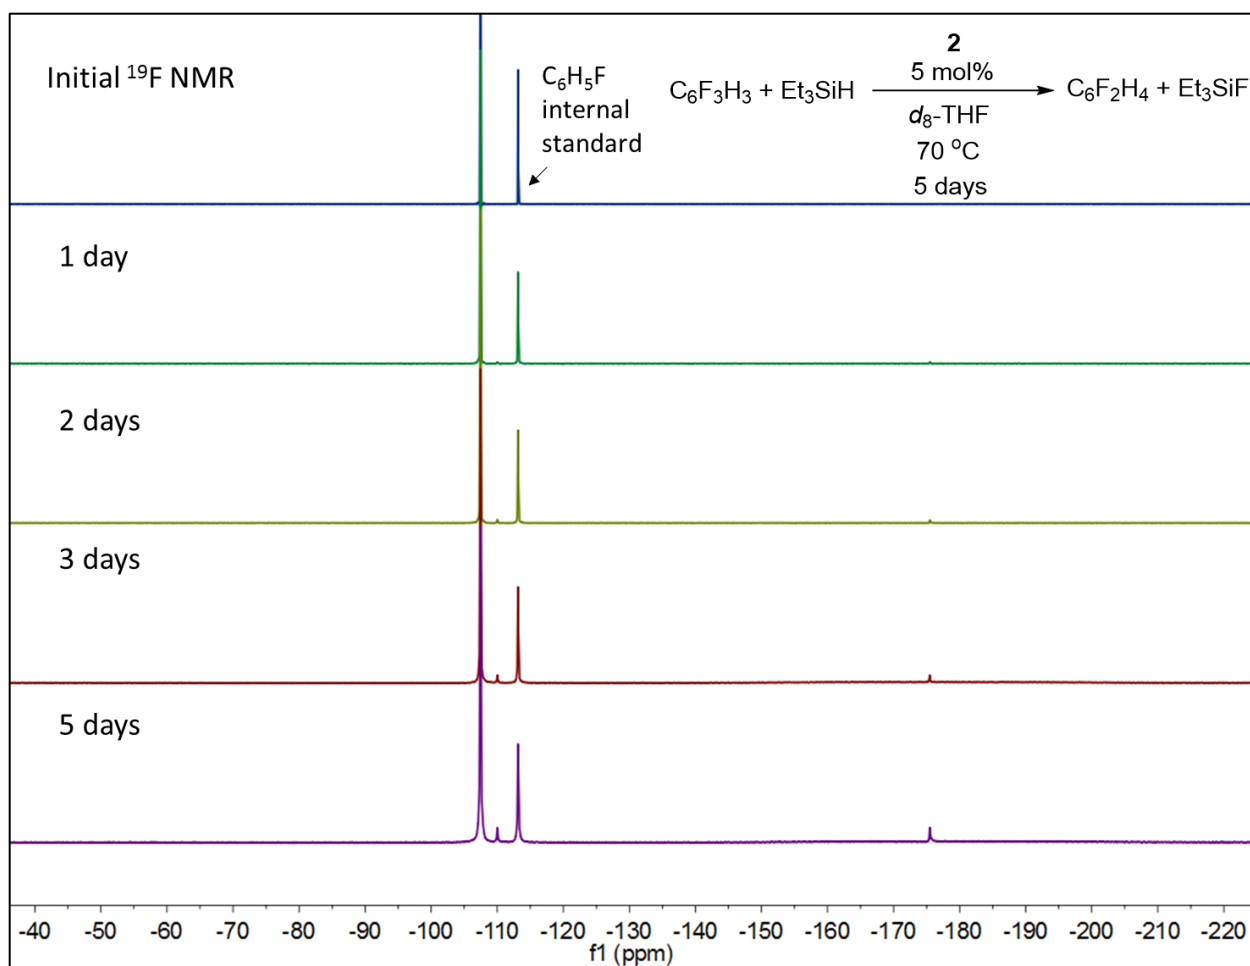

**Figure S19:** Stacked  $^{19}\text{F}$  NMR spectra for the monodefluorination of  $\text{C}_6\text{F}_3\text{H}_3$  in the presence of  $\text{Et}_3\text{SiH}$  using **2** as the catalyst at  $70^\circ\text{C}$  in  $d_8\text{-THF}$ . Fluorobenzene ( $\text{C}_6\text{H}_5\text{F}$ ) is used as the internal standard. The  $^{19}\text{F}$  resonances corresponding to 1,3-difluorobenzene ( $\text{C}_6\text{F}_2\text{H}_4$ ) at  $\delta - 110.0$  and fluorotriethylsilane at  $\delta - 175.5$  are first observed after 2 days of reactivity. All spectra collected in  $d_8\text{-THF}$  at 282 MHz at  $25^\circ\text{C}$ .

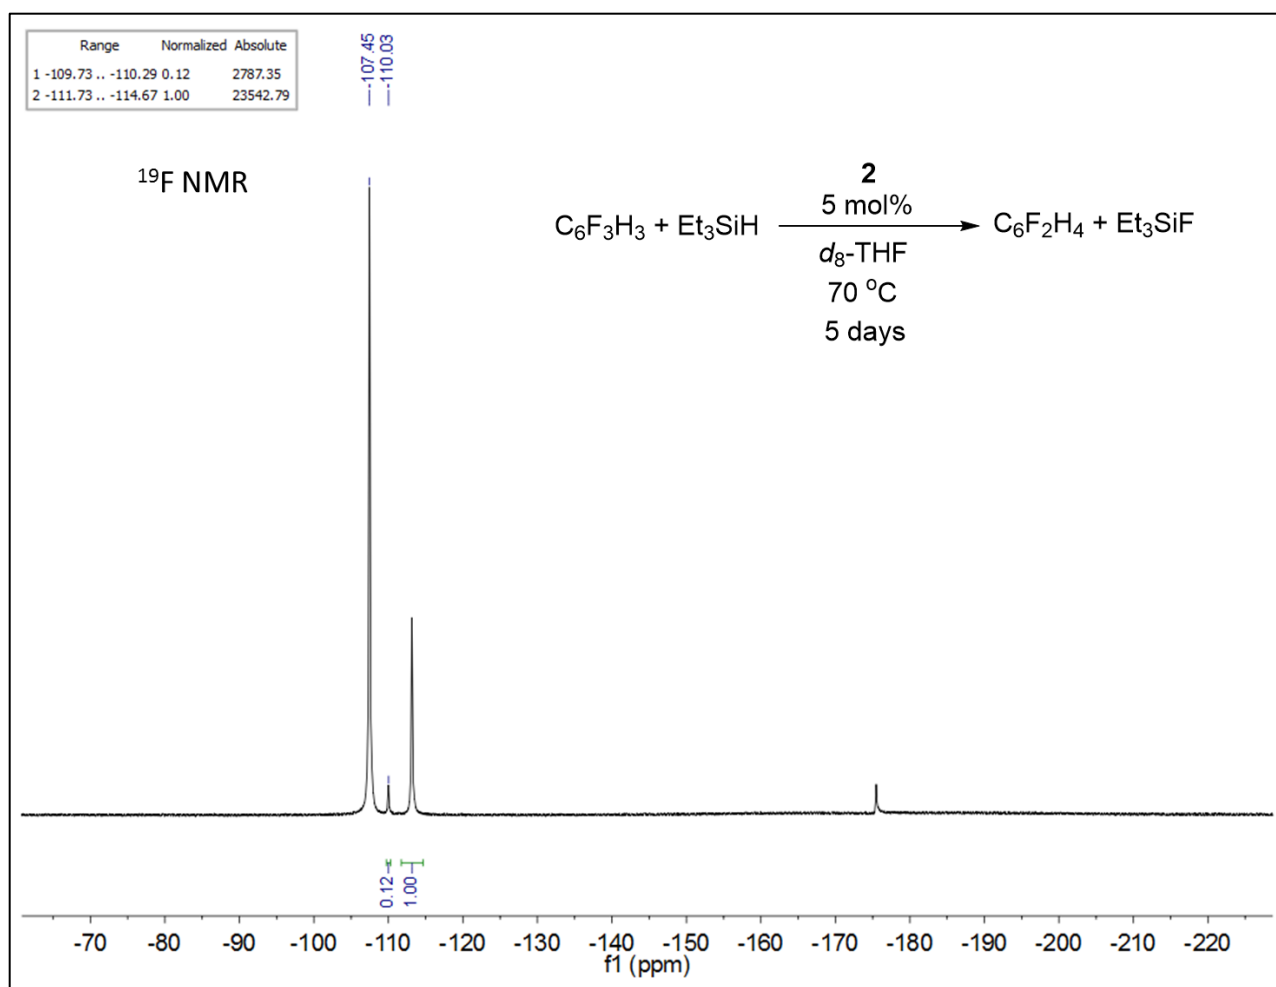

**Figure S20:** <sup>19</sup>F NMR spectrum for the final time point at 5 days for the monodefluorination of C<sub>6</sub>F<sub>3</sub>H<sub>3</sub> in the presence of Et<sub>3</sub>SiH using **2** as the catalyst at 70 °C in d<sub>8</sub>-THF. A stoichiometric amount of fluorobenzene (C<sub>6</sub>H<sub>5</sub>F) relative to the initial C<sub>6</sub>F<sub>3</sub>H<sub>3</sub> and Et<sub>3</sub>SiH was used as the internal standard (0.546 M, 0.339 mmol). The <sup>19</sup>F resonance corresponding to 1,3-difluorobenzene (C<sub>6</sub>F<sub>2</sub>H<sub>4</sub>) at  $\delta$  -110.0 was used for integration purposes (TON=1.2). A relaxation delay of 70 seconds was used between scans in the <sup>19</sup>F NMR experiment (282 MHz, d<sub>8</sub>-THF, 25 °C).

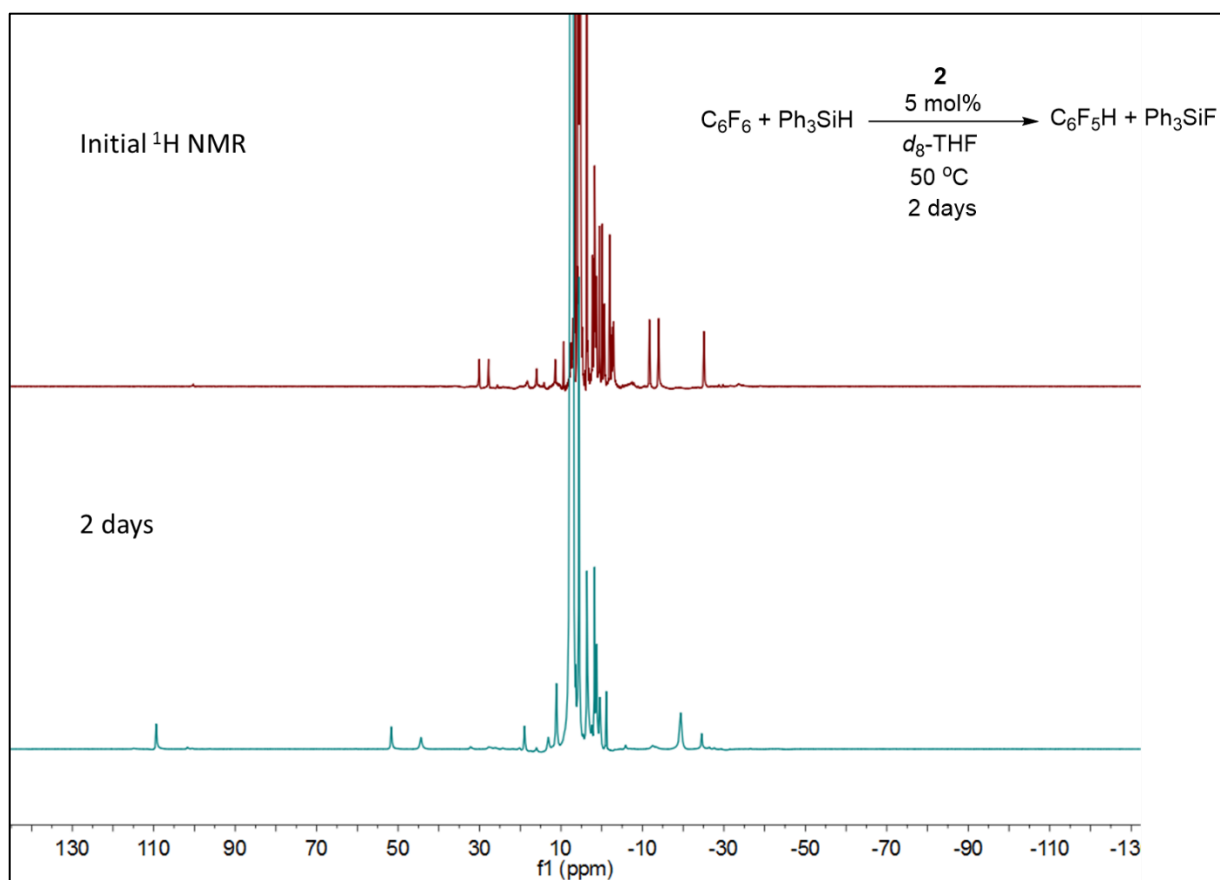

**Figure S21:** Stacked  $^1\text{H}$  NMR spectra for the catalytic monodefluorination of  $\text{C}_6\text{F}_6$  in the presence of  $\text{Ph}_3\text{SiH}$  using **2** as the catalyst at  $50\text{ }^\circ\text{C}$  in  $d_8\text{-THF}$ . A new paramagnetic species is formed, which is the resting state of the catalyst. All spectra collected in  $d_8\text{-THF}$  at 300 MHz at  $25\text{ }^\circ\text{C}$ .

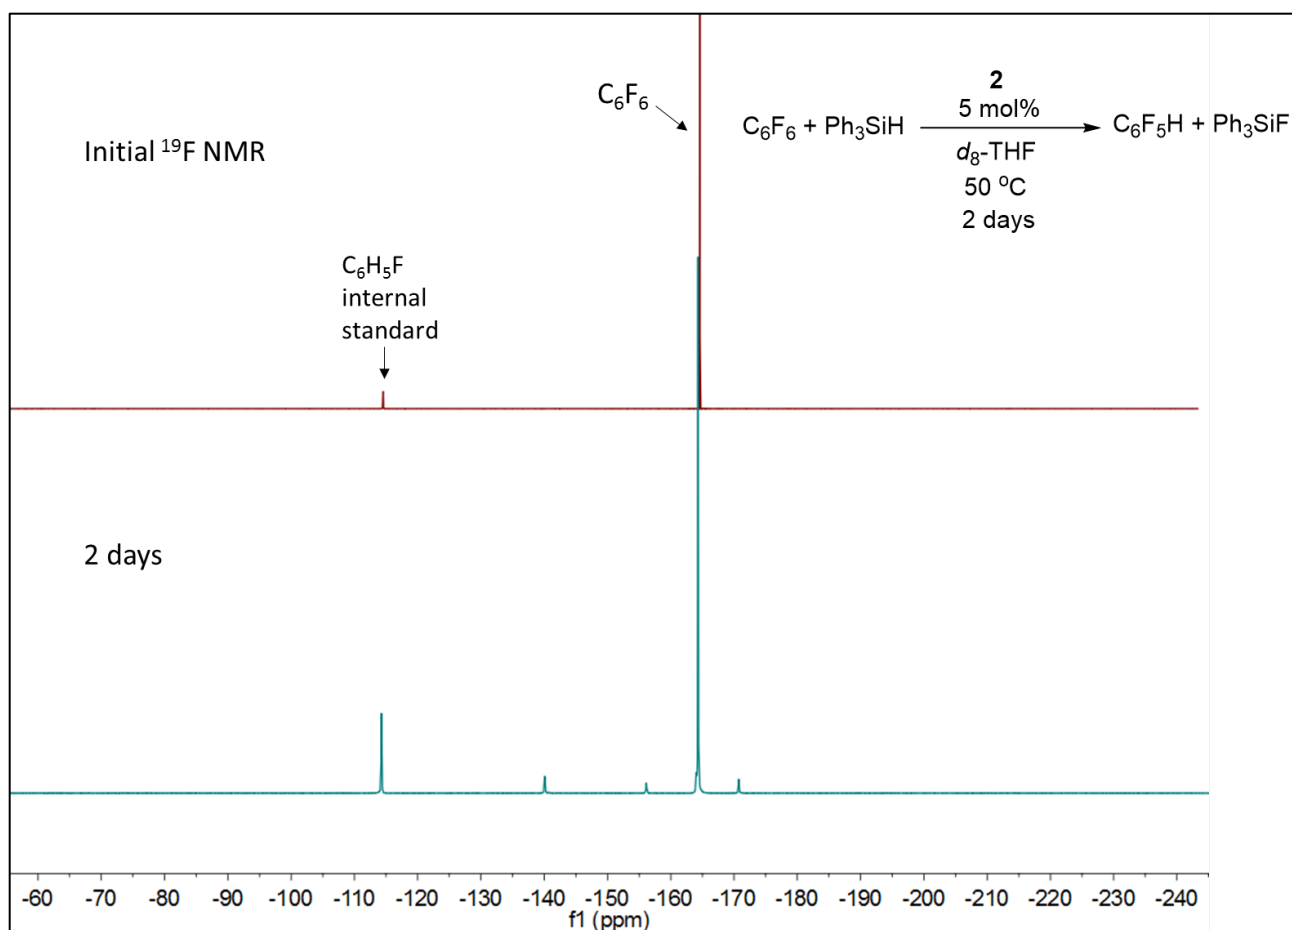

**Figure S22:** Stacked  $^{19}\text{F}$  NMR spectra for the catalytic monodefluorination of  $\text{C}_6\text{F}_6$  in the presence of  $\text{Ph}_3\text{SiH}$  using **2** as the catalyst at  $50\text{ }^\circ\text{C}$  in  $d_8\text{-THF}$ . Fluorobenzene ( $\text{C}_6\text{H}_5\text{F}$ ) is used as the internal standard.  $^{19}\text{F}$  resonances corresponding to pentafluorobenzene ( $\text{C}_6\text{F}_5\text{H}$ ) at  $\delta$  -139.0, -155.0, and -162.9 and fluorotriphenylsilane at  $\delta$  -169.6 are observed after 2 days of reactivity. All spectra collected in  $d_8\text{-THF}$  at 282 MHz at  $25\text{ }^\circ\text{C}$ .

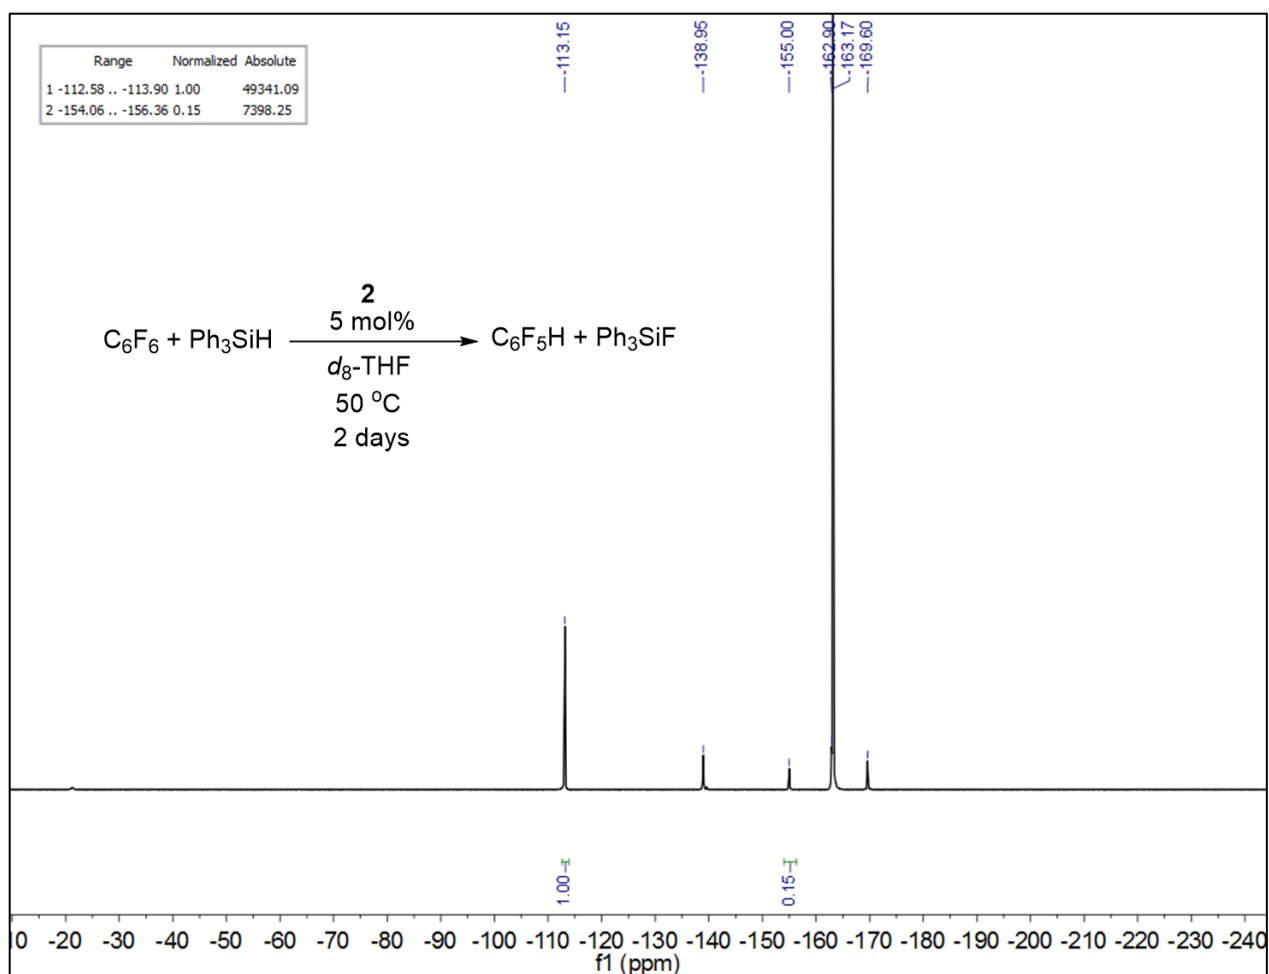

**Figure S23:**  $^{19}\text{F}$  NMR spectrum for the final time point at 2 days for the catalytic monodefluorination of  $\text{C}_6\text{F}_6$  in the presence of  $\text{Ph}_3\text{SiH}$  using **2** as the catalyst at  $50\text{ }^\circ\text{C}$  in  $d_8\text{-THF}$ . A stoichiometric amount of fluorobenzene ( $\text{C}_6\text{H}_5\text{F}$ ) relative to the initial  $\text{C}_6\text{F}_6$  and  $\text{Ph}_3\text{SiH}$  was used as the internal standard (0.796 M, 0.440 mmol). The  $^{19}\text{F}$  resonance corresponding to the *para* position of pentafluorobenzene ( $\text{C}_6\text{F}_5\text{H}$ ) at  $\delta$  -155.0 was used for integration purposes (TON=3.0). A relaxation delay of 50 seconds was used between scans in the  $^{19}\text{F}$  NMR experiment (282 MHz,  $d_8\text{-THF}$ ,  $25\text{ }^\circ\text{C}$ ).

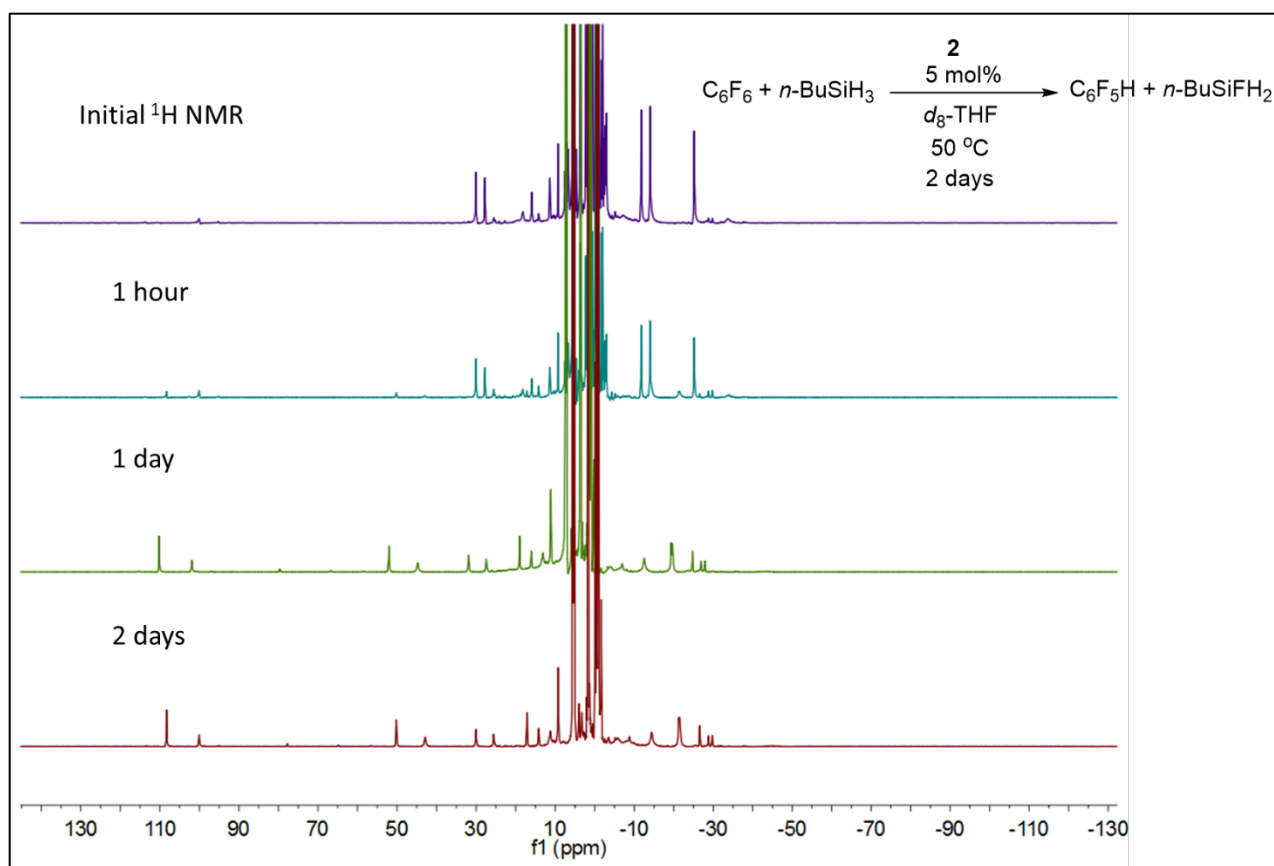

**Figure S24:** Stacked  $^1\text{H}$  NMR spectra for the catalytic monodefluorination of  $\text{C}_6\text{F}_6$  in the presence of  $n\text{-BuSiH}_3$  using **2** as the catalyst at  $50^\circ\text{C}$  in  $d_8\text{-THF}$ . A new paramagnetic species is formed, which is the resting state of the catalyst. All spectra collected in  $d_8\text{-THF}$  at 300 MHz at  $25^\circ\text{C}$ .

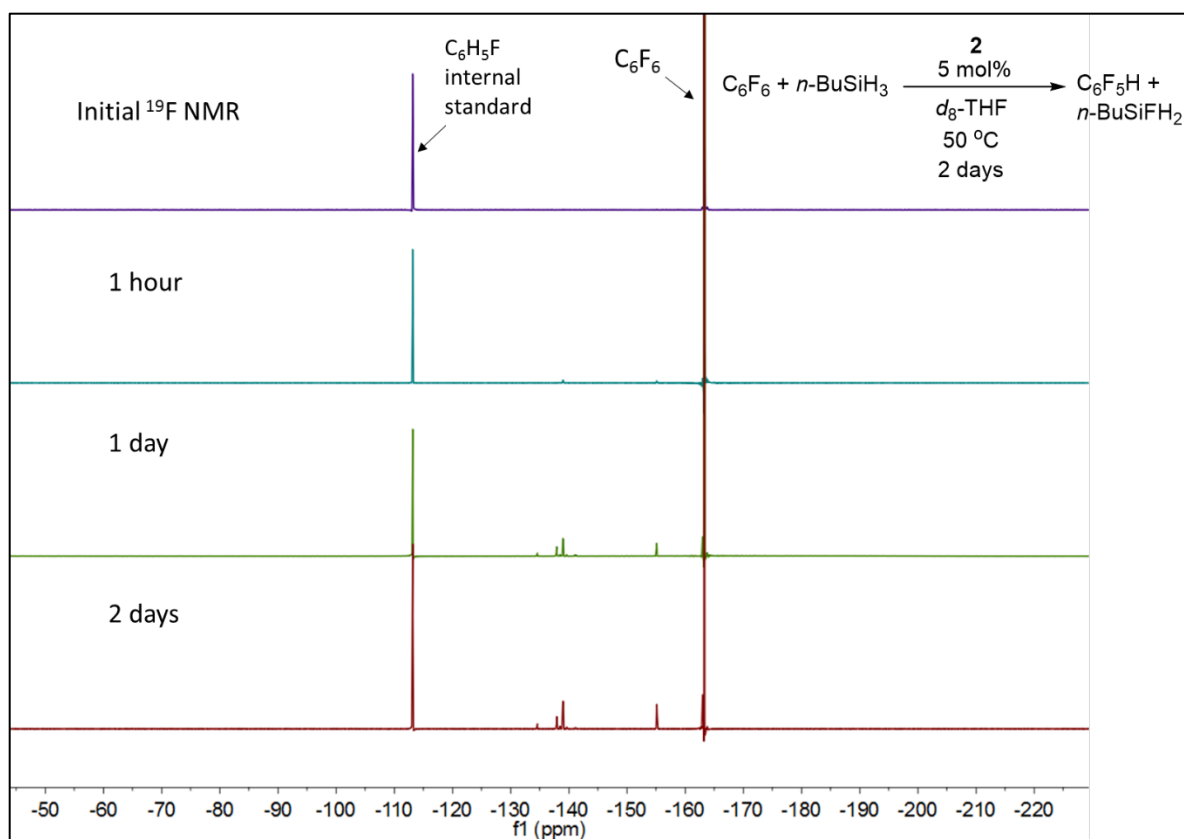

**Figure S25:** Stacked  $^{19}\text{F}$  NMR spectra for the catalytic monodefluorination of  $\text{C}_6\text{F}_6$  in the presence of  $n\text{-BuSiH}_3$  using **2** as the catalyst at  $50^\circ\text{C}$  in  $d_8\text{-THF}$ . Fluorobenzene ( $\text{C}_6\text{H}_5\text{F}$ ) is used as the internal standard.  $^{19}\text{F}$  resonances corresponding to pentafluorobenzene ( $\text{C}_6\text{F}_5\text{H}$ ) at  $\delta$  - 138.9, -155.1, and -163.0 are first observed after 1 day of reactivity. All spectra collected in  $d_8\text{-THF}$  at 282 MHz at  $25^\circ\text{C}$ .

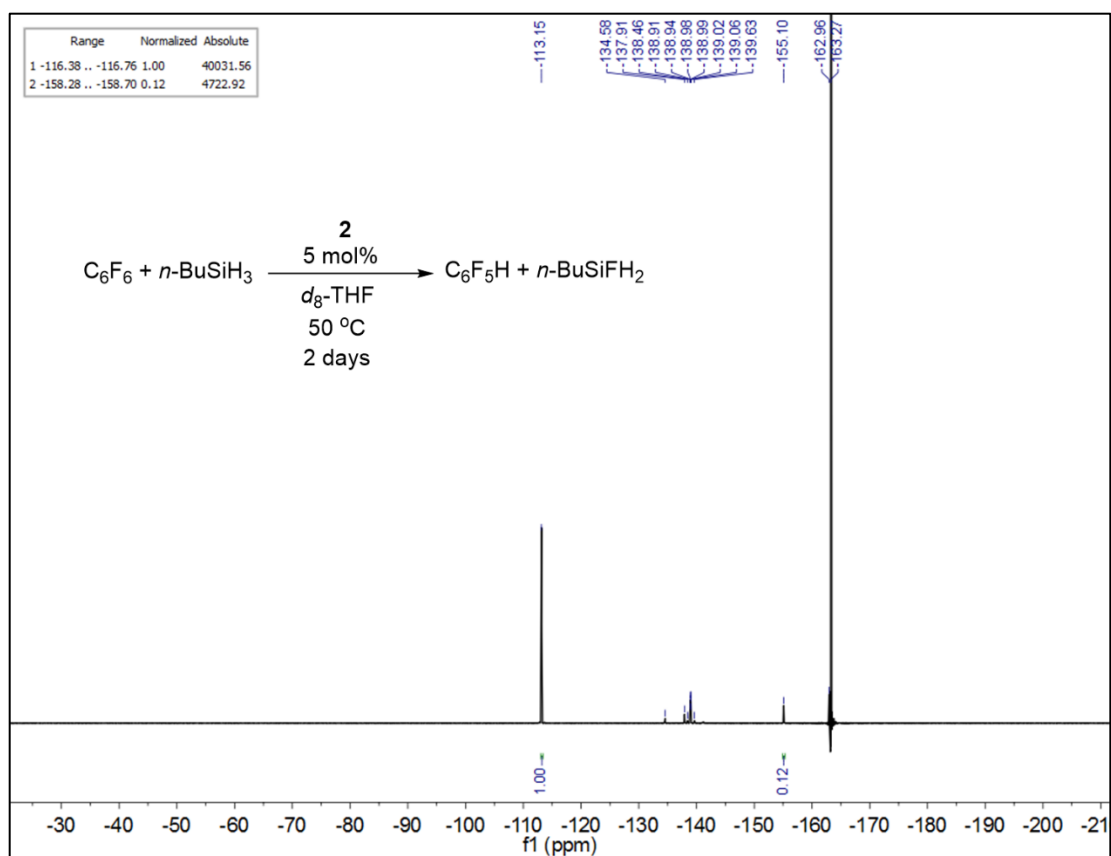

**Figure S26:**  $^{19}\text{F}$  NMR spectrum for the final time point at 2 days for the catalytic monodefluorination of  $\text{C}_6\text{F}_6$  in the presence of  $n\text{-BuSiH}_3$  using **2** as the catalyst at  $50\text{ }^\circ\text{C}$  in  $d_8\text{-THF}$ . A stoichiometric amount of fluorobenzene ( $\text{C}_6\text{H}_5\text{F}$ ) relative to the initial  $\text{C}_6\text{F}_6$  and  $n\text{-BuSiH}_3$  was used as the internal standard (0.576 M, 0.440 mmol). The  $^{19}\text{F}$  resonance corresponding to the *para* position of pentafluorobenzene ( $\text{C}_6\text{F}_5\text{H}$ ) at  $\delta$  -155.1 was used for integration purposes (TON=2.4). A relaxation delay of 50 seconds was used between scans in the  $^{19}\text{F}$  NMR experiment (282 MHz,  $d_8\text{-THF}$ ,  $25\text{ }^\circ\text{C}$ ).

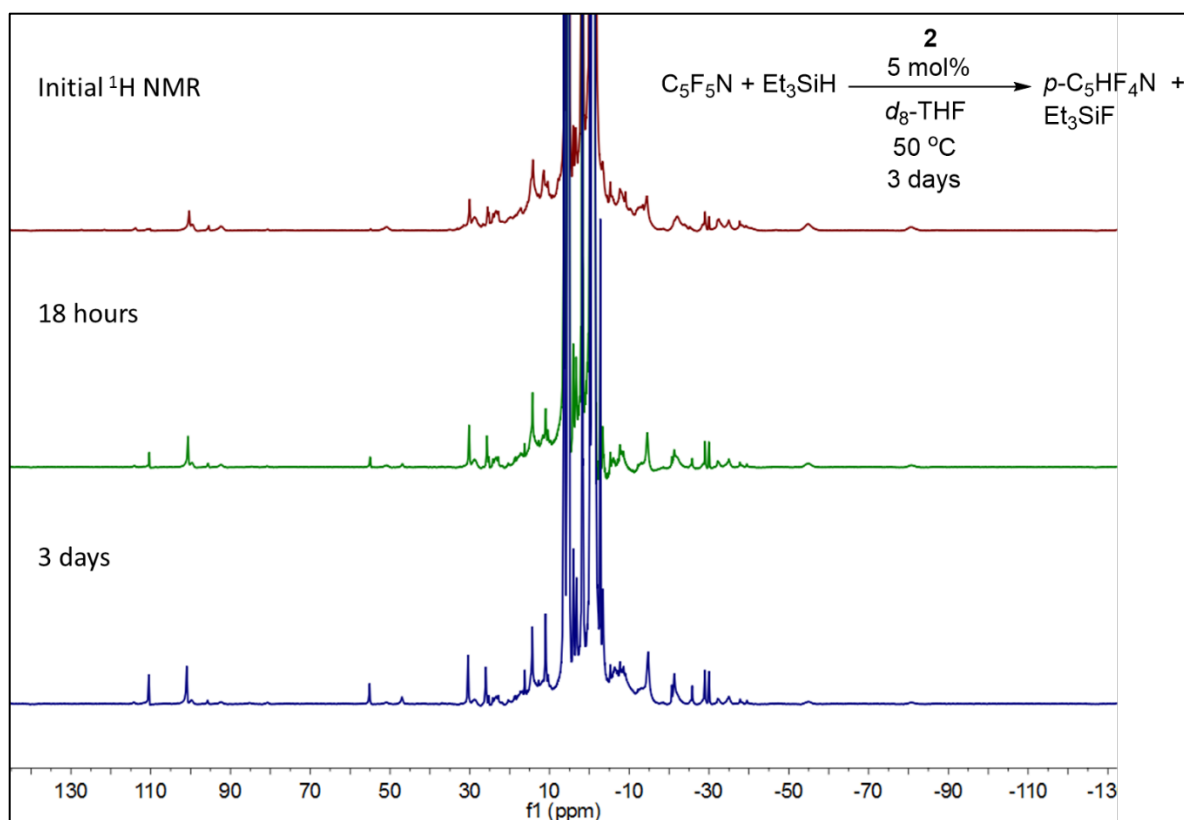

**Figure S27:** Stacked  $^1\text{H}$  NMR spectra for the catalytic monodefluorination of  $\text{C}_5\text{F}_5\text{N}$  in the presence of  $\text{Et}_3\text{SiH}$  using **2** as the catalyst at  $50\text{ }^\circ\text{C}$  in  $d_8\text{-THF}$ . A new paramagnetic species is immediately formed from **2** at time point zero. This species is different from the resting state produced during catalysis, as observed at the 18h and 3 day time points. All spectra collected in  $d_8\text{-THF}$  at 300 MHz at  $25\text{ }^\circ\text{C}$ .

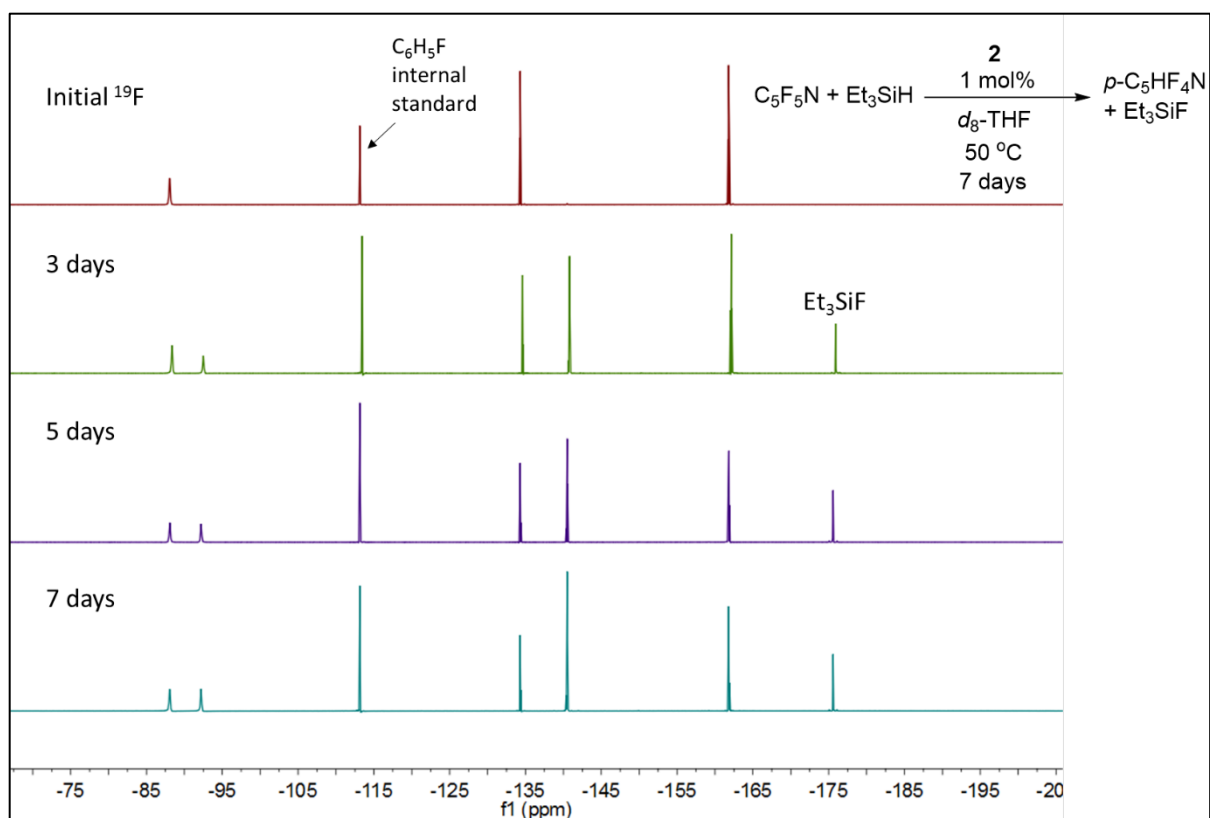

**Figure S28:** Stacked  $^{19}\text{F}$  NMR spectra for the monodefluorination of  $\text{C}_5\text{F}_5\text{N}$  in the presence of  $\text{Et}_3\text{SiH}$  using 1 mol% **2** as the catalyst at 50  $^\circ\text{C}$  in  $d_8\text{-THF}$ . Fluorobenzene ( $\text{C}_6\text{H}_5\text{F}$ ) is used as the internal standard. After a week of reactivity, 50% conversion is obtained as determined by quantitative integration of the  $\text{Et}_3\text{SiF}$  resonance at  $\delta$  -175.6. All spectra collected in  $d_8\text{-THF}$  at 282 MHz at 25  $^\circ\text{C}$ .

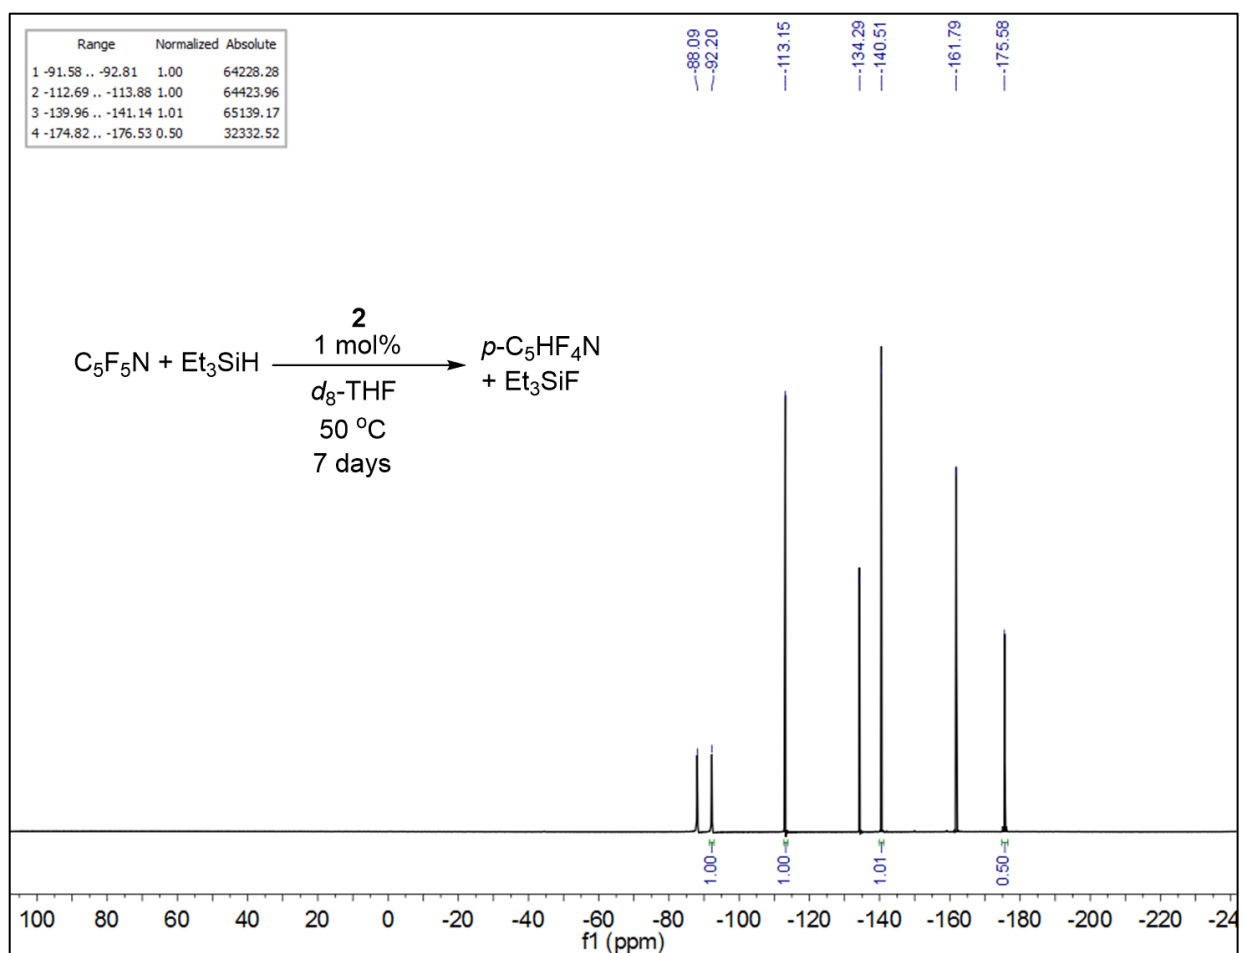

**Figure S29:**  $^{19}\text{F}$  NMR spectrum for the final time point of 7 days in the monodefluorination of  $\text{C}_5\text{F}_5\text{N}$  in the presence of  $\text{Et}_3\text{SiH}$  using 1 mol% **2** as the catalyst at  $50\text{ }^\circ\text{C}$  in  $d_8\text{-THF}$ . Fluorobenzene ( $\text{C}_6\text{H}_5\text{F}$ ) at  $\delta$  -113.2 is used as the internal standard (1.083 M, 0.678 mmol). Integration of the  $\text{Et}_3\text{SiF}$  resonance at  $\delta$  -175.6 relative to  $\text{C}_6\text{H}_5\text{F}$  shows 50% conversion (TON=50). A relaxation delay of 70 seconds was used between each scan in the  $^{19}\text{F}$  NMR experiment (282 MHz,  $d_8\text{-THF}$ ,  $25\text{ }^\circ\text{C}$ ).

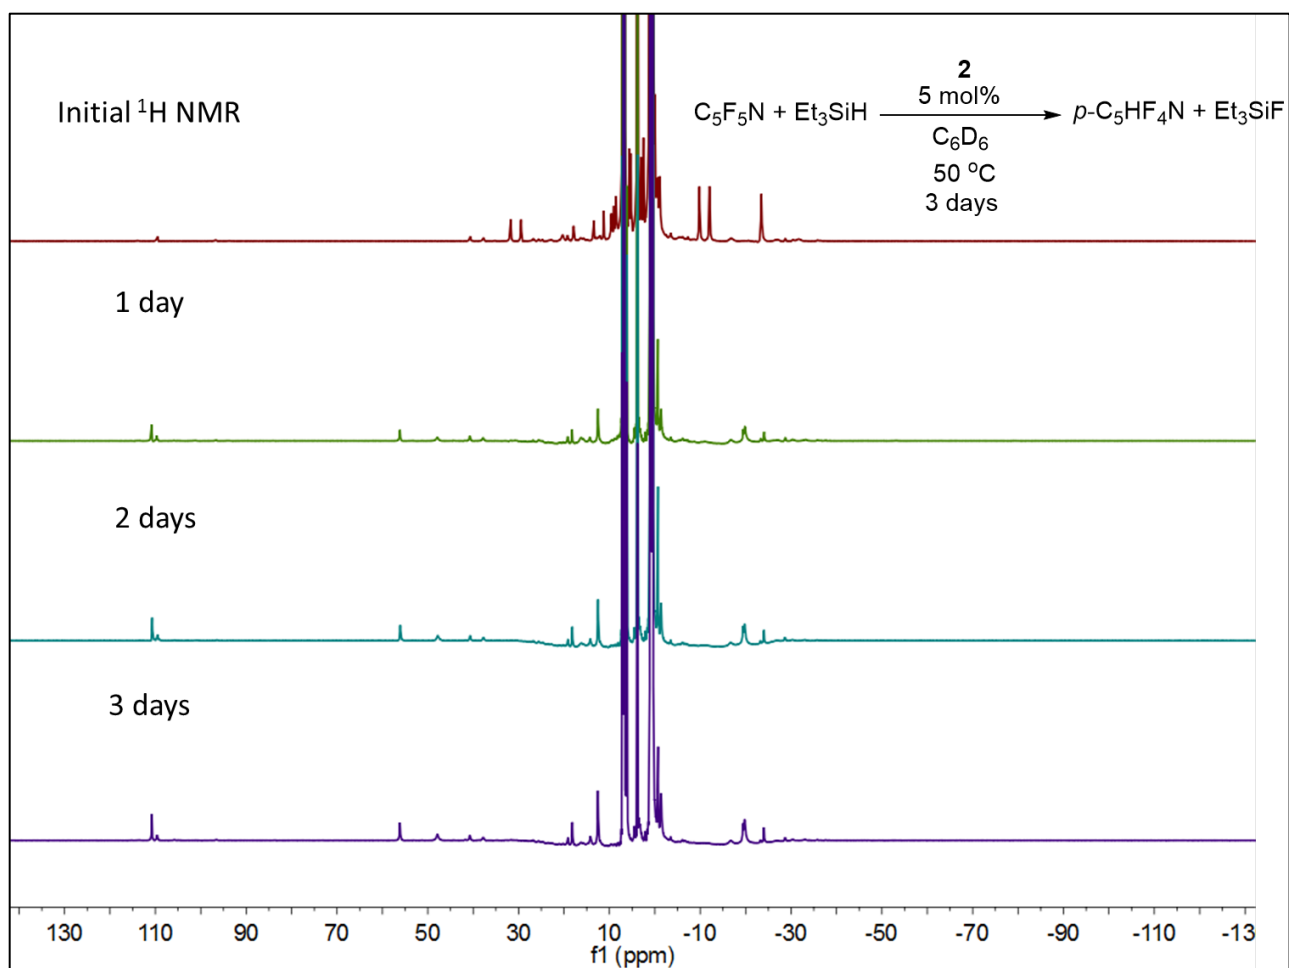

**Figure S30:** Stacked  $^1\text{H}$  NMR spectra for the catalytic monodefluorination of  $\text{C}_5\text{F}_5\text{N}$  in the presence of  $\text{Et}_3\text{SiH}$  using **2** as the catalyst at  $50^\circ\text{C}$  in  $d_6$ -benzene. A new paramagnetic species is formed from **2** after 1 day of allowing catalysis to proceed. All spectra collected in  $d_8$ -THF at 300 MHz at  $25^\circ\text{C}$ .

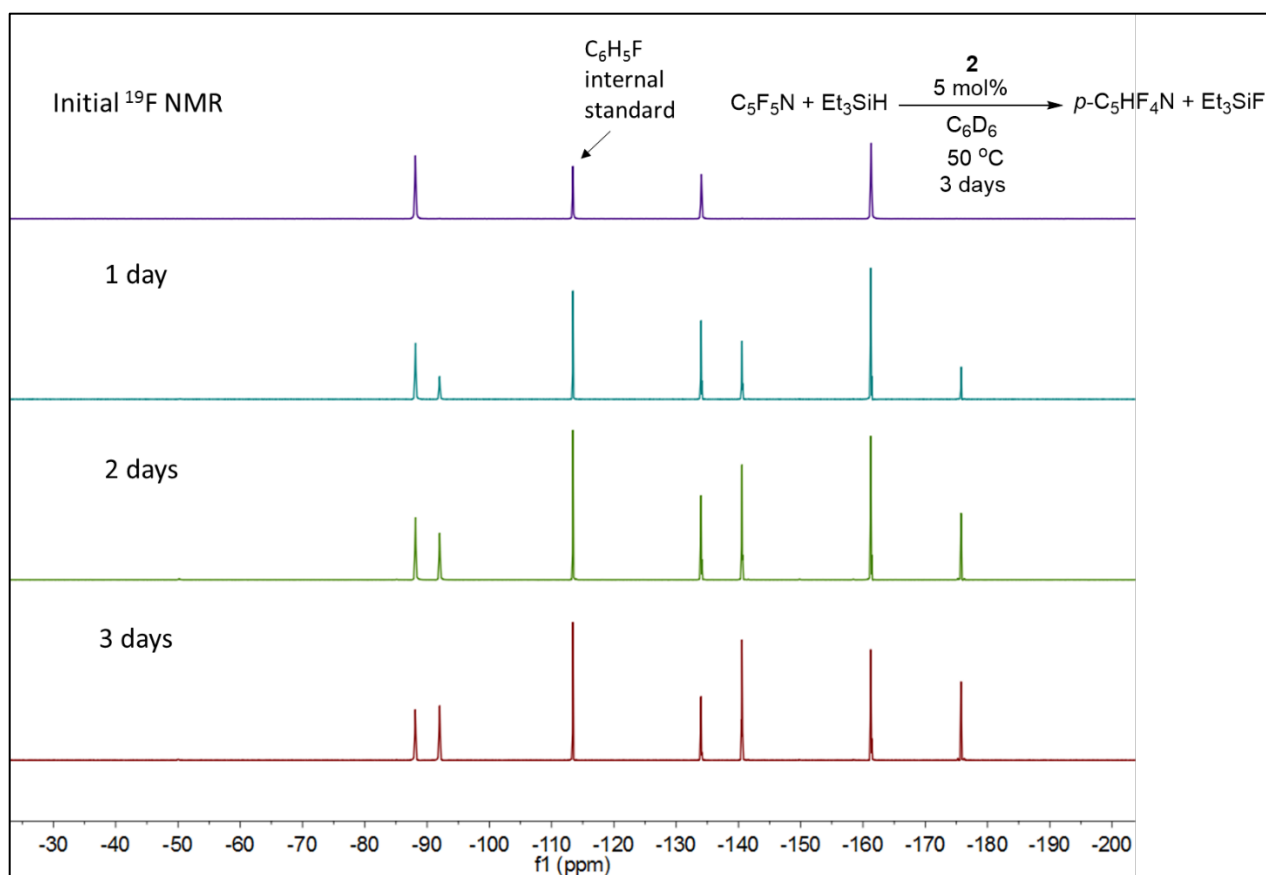

**Figure S31:** Stacked  $^{19}\text{F}$  NMR spectra for the monodefluorination of  $\text{C}_5\text{F}_5\text{N}$  in the presence of  $\text{Et}_3\text{SiH}$  using 5 mol% **2** as the catalyst at  $50^\circ\text{C}$  in  $d_6$ -benzene. Fluorobenzene ( $\text{C}_6\text{H}_5\text{F}$ ) is used as the internal standard. Conversion is lower compared to when catalysis is performed in  $d_8$ -THF (**Figure S28**). A relaxation delay of 70 seconds was used between each scan in the  $^{19}\text{F}$  NMR experiment. All spectra collected in  $d_6$ -benzene at 282 MHz at  $25^\circ\text{C}$ .

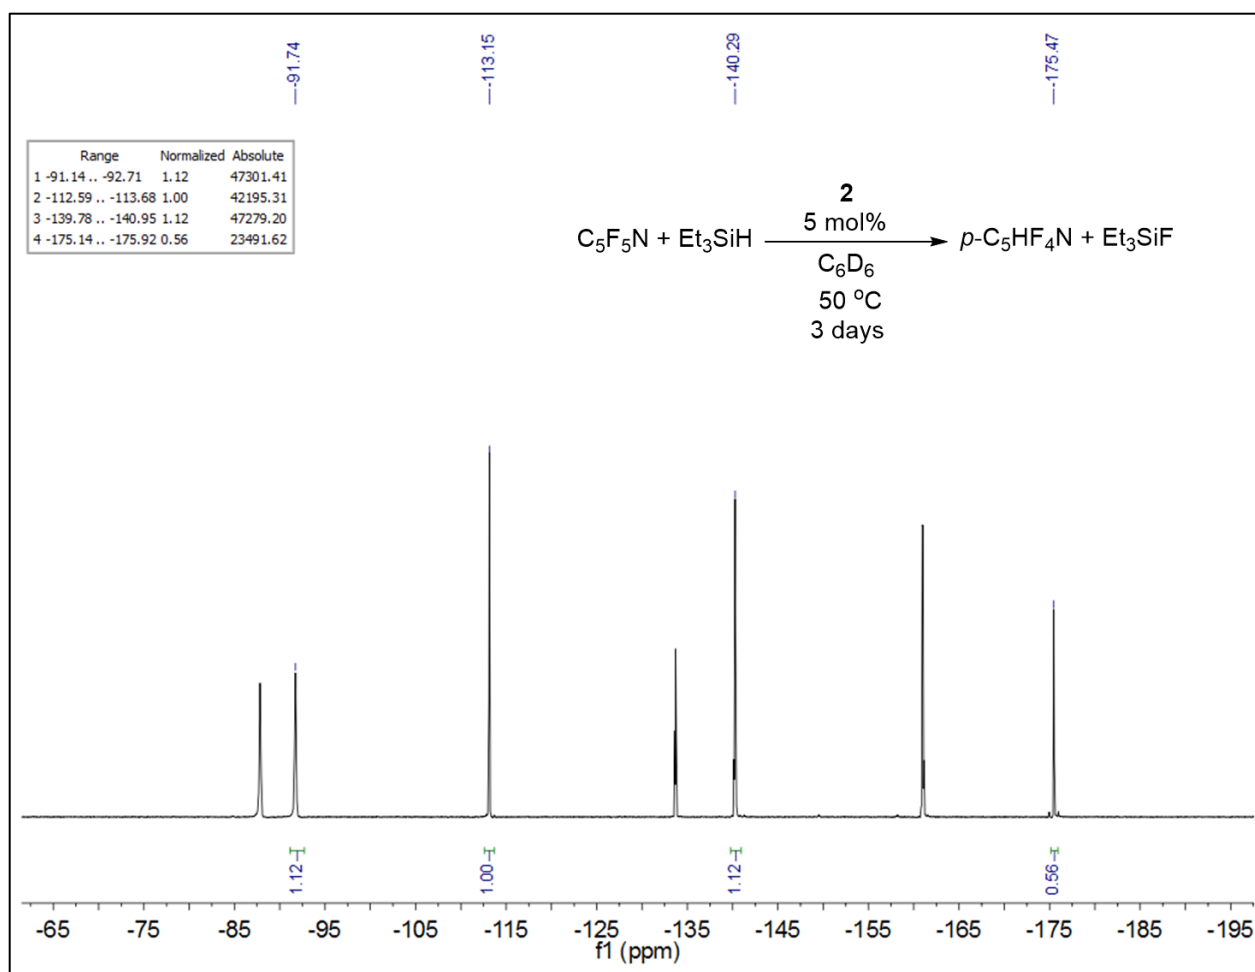

**Figure S32:** <sup>19</sup>F NMR spectrum for the final time point after 3 days for the monodefluorination of C<sub>5</sub>F<sub>5</sub>N in the presence of Et<sub>3</sub>SiH using 5 mol% **2** as the catalyst at 50 °C in *d*<sub>6</sub>-benzene. Fluorobenzene (C<sub>6</sub>H<sub>5</sub>F) at δ -113.2 is used as the internal standard (0.703 M, 0.372 mmol). Integration of the Et<sub>3</sub>SiF resonance at δ -175.6 relative to C<sub>6</sub>H<sub>5</sub>F shows 56% conversion (TON=11.2). A relaxation delay of 70 seconds was used between each scan in the <sup>19</sup>F NMR experiment (282 MHz, *d*<sub>8</sub>-THF, 25 °C).

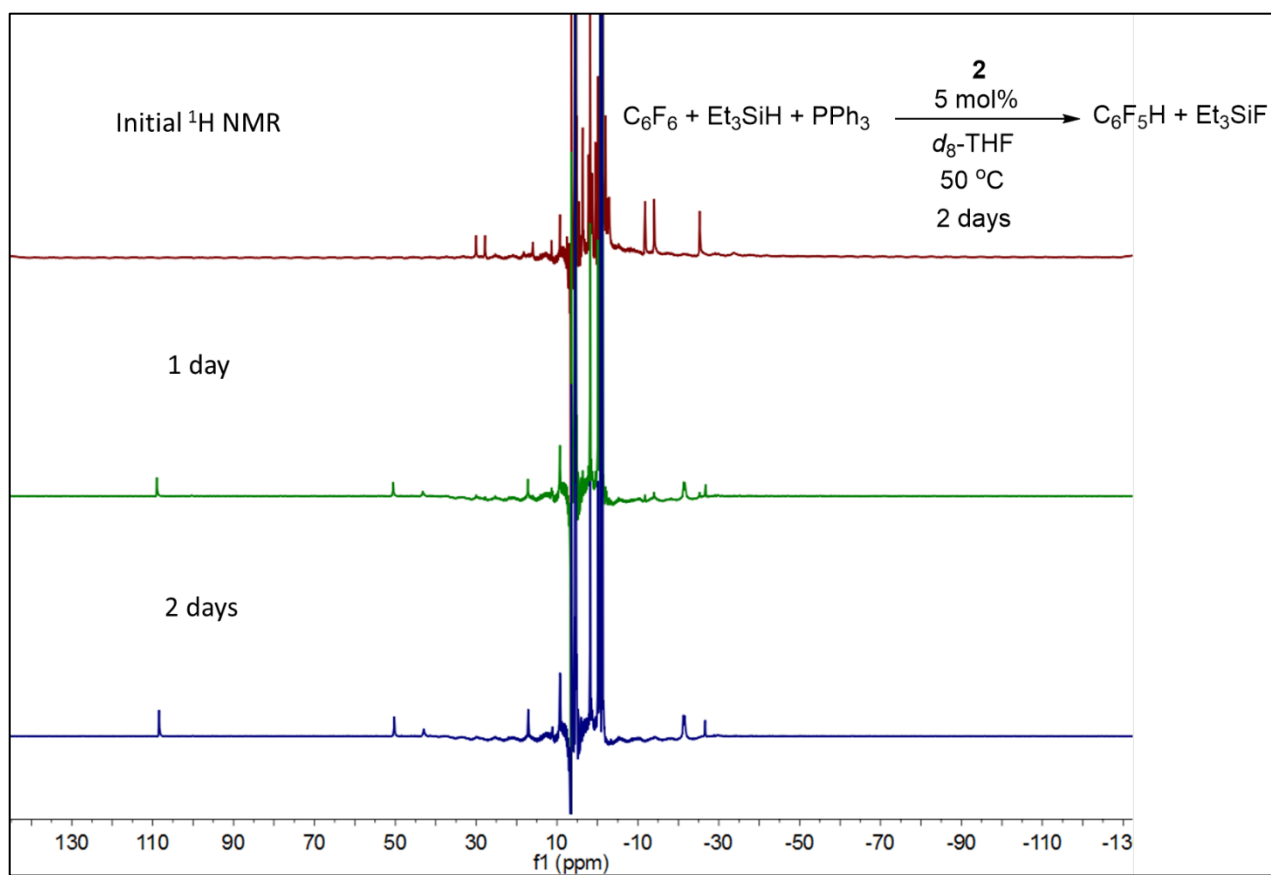

**Figure S33:** Stacked  $^1\text{H}$  NMR spectra for the catalytic monodefluorination of  $\text{C}_6\text{F}_6$  in the presence of  $\text{Et}_3\text{SiH}$  and  $\text{PPh}_3$  using **2** as the catalyst at  $50\text{ }^\circ\text{C}$  in  $d_8\text{-THF}$ . A new paramagnetic species is formed from **2** after 1 day of allowing catalysis to proceed, though this species has the same chemical shifts as the iron containing resting state when catalysis is performed in the absence of  $\text{PPh}_3$ . All spectra collected in  $d_8\text{-THF}$  at 300 MHz at  $25\text{ }^\circ\text{C}$ .

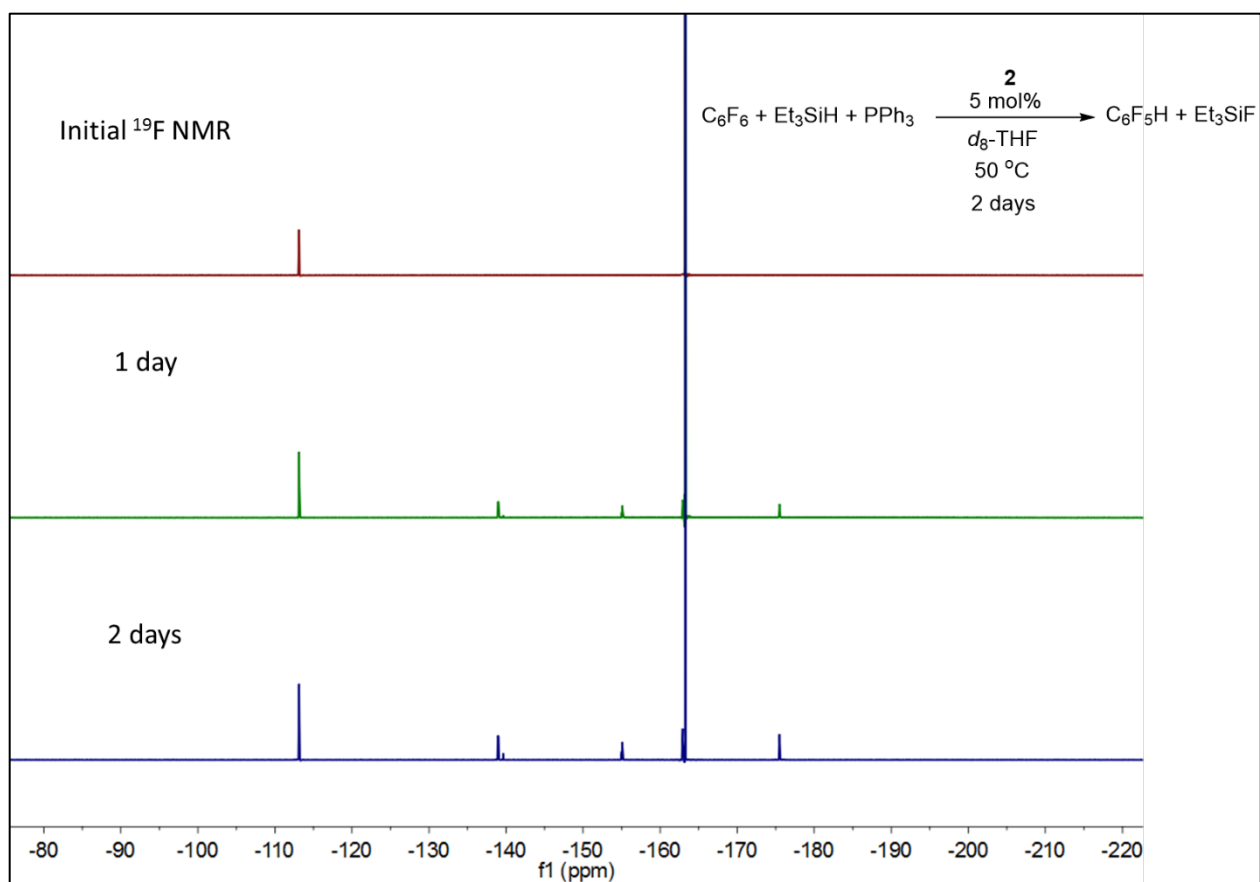

**Figure S34:** Stacked  $^{19}\text{F}$  NMR spectra for the monodefluorination of  $\text{C}_6\text{F}_6$  in the presence of  $\text{Et}_3\text{SiH}$  and  $\text{PPh}_3$  using 5 mol% **2** as the catalyst at 50  $^\circ\text{C}$  in  $d_8$ -THF. Fluorobenzene ( $\text{C}_6\text{H}_5\text{F}$ ) is used as the internal standard. All spectra collected in  $d_6$ -benzene at 282 MHz at 25  $^\circ\text{C}$ .

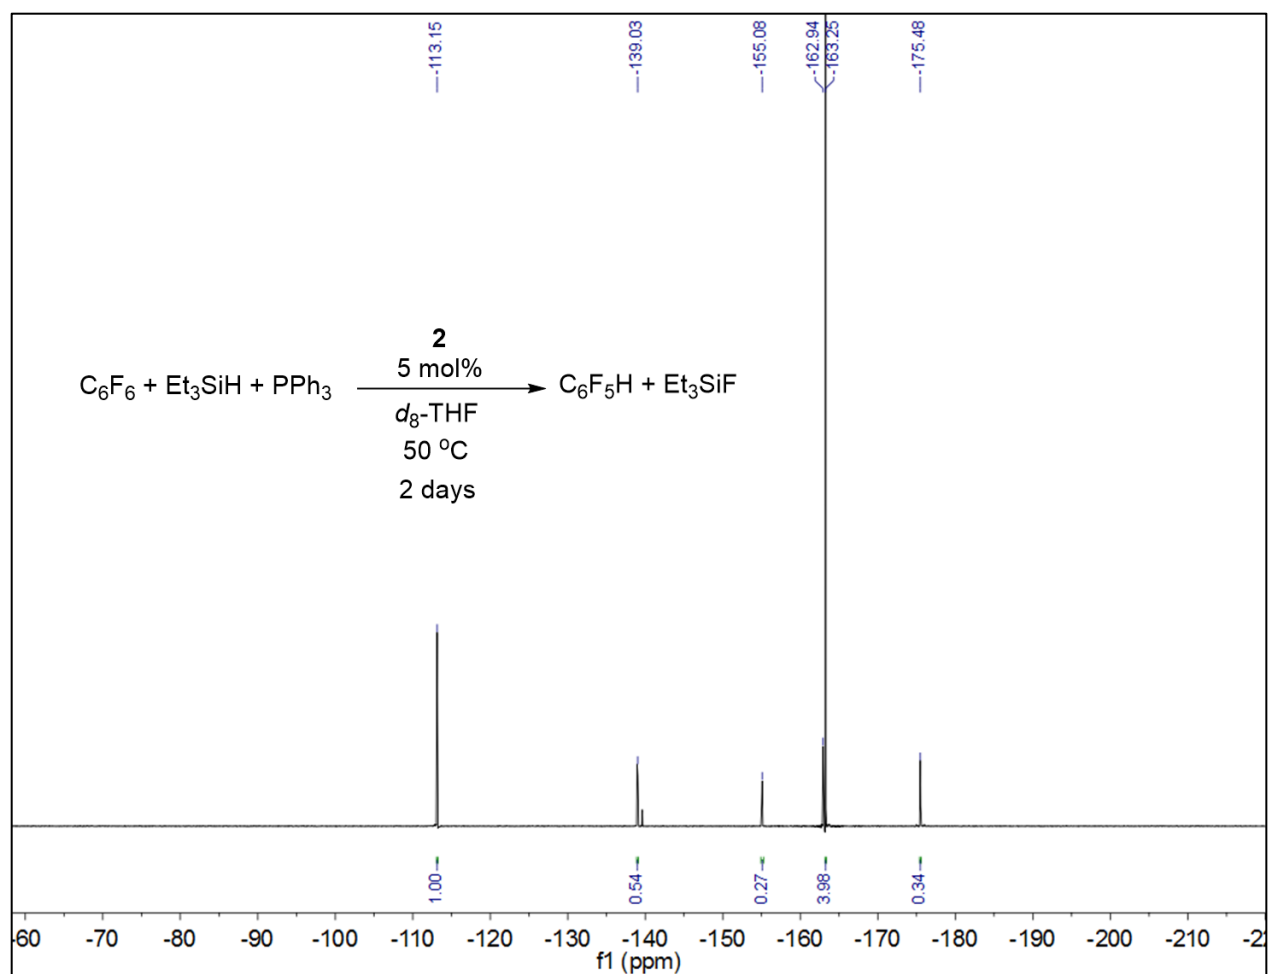

**Figure S35:**  $^{19}\text{F}$  NMR spectrum for the final time point after 2 days for the monodefluorination of  $\text{C}_6\text{F}_6$  in the presence of  $\text{Et}_3\text{SiH}$  and  $\text{PPh}_3$  using 5 mol% **2** as the catalyst at 50  $^\circ\text{C}$  in  $d_8\text{-THF}$ . Fluorobenzene ( $\text{C}_6\text{H}_5\text{F}$ ) at  $\delta$  -113.2 is used as the internal standard (0.469 M, 0.203 mmol). The  $^{19}\text{F}$  resonance corresponding to the *para* position of pentafluorobenzene ( $\text{C}_6\text{F}_5\text{H}$ ) at  $\delta$  -155.1 was used for integration purposes (TON=5.4). A relaxation delay of 50 seconds was used between scans in the  $^{19}\text{F}$  NMR experiment (282 MHz,  $d_8\text{-THF}$ , 25  $^\circ\text{C}$ ).

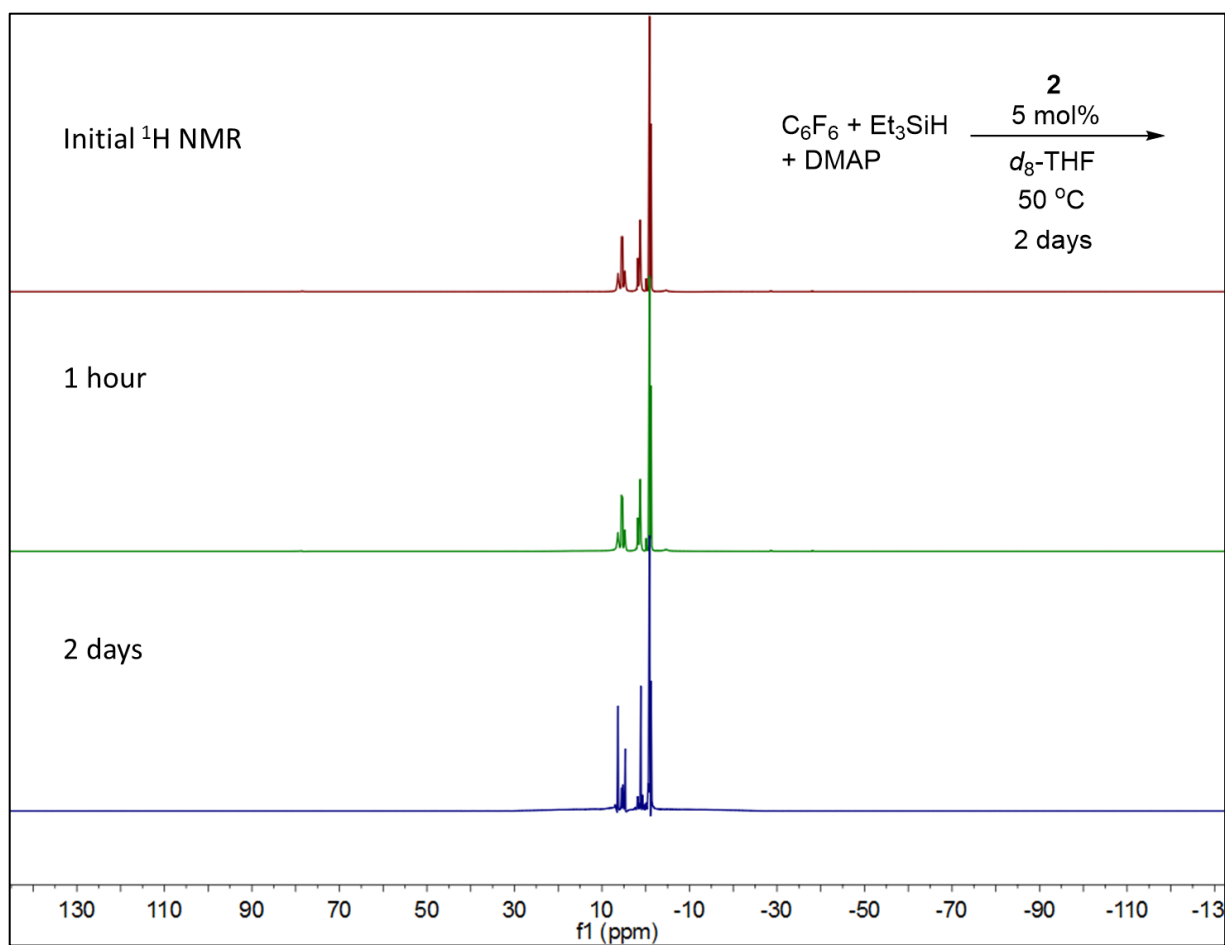

**Figure S36:** Stacked  $^1\text{H}$  NMR spectra for the attempted monodefluorination of  $\text{C}_6\text{F}_6$  in the presence of  $\text{Et}_3\text{SiH}$  and 4-(dimethylamino)pyridine (DMAP) using 5 mol% **2** at 50 °C in  $d_8$ -THF. A new species is immediately formed from the coordination of DMAP to **2**. All spectra collected in  $d_8$ -THF at 300 MHz at 25 °C.

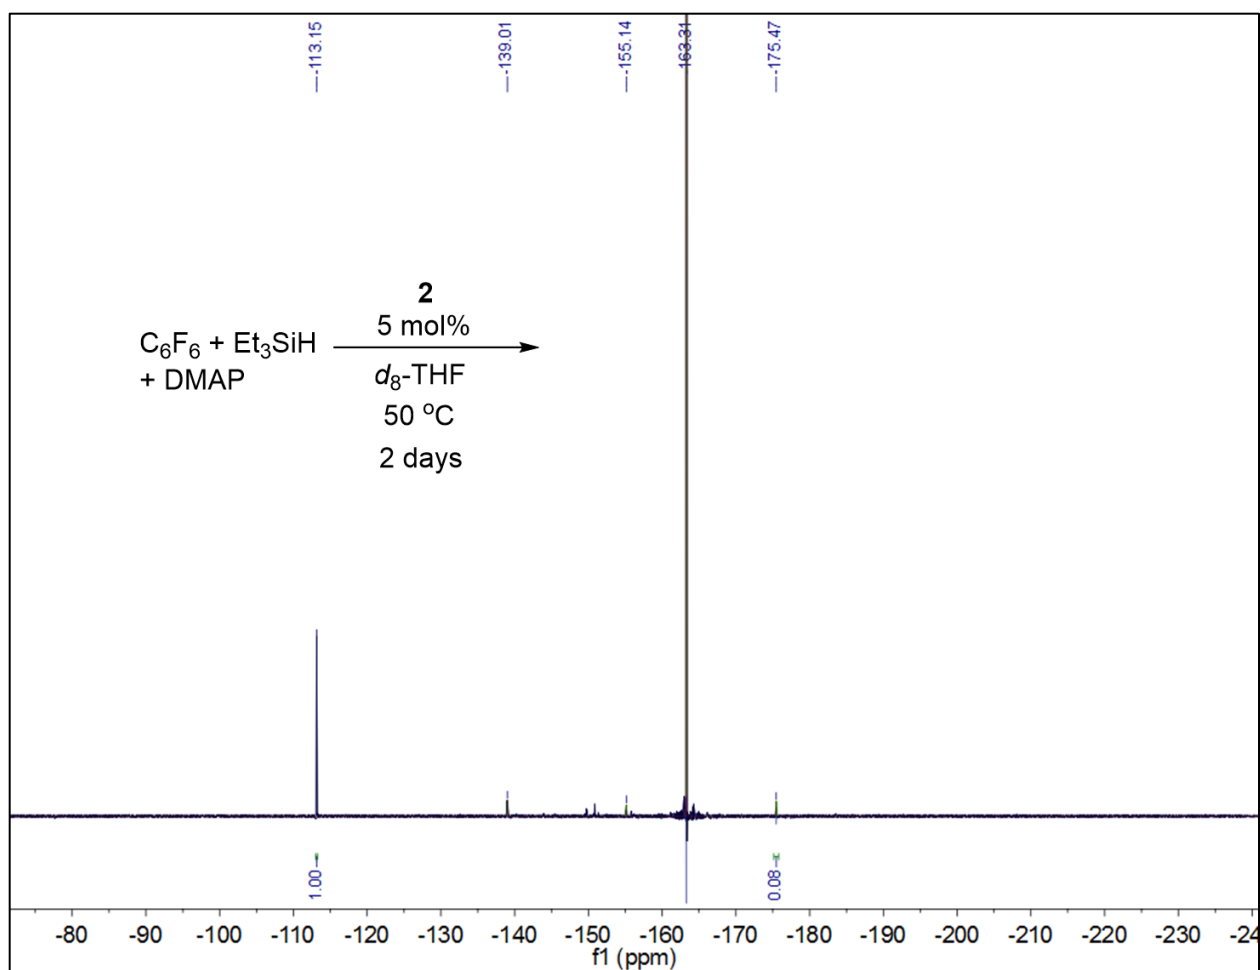

**Figure S37:**  $^{19}\text{F}$  NMR spectrum for the final time point after 2 days for the attempted monodefluorination of  $\text{C}_6\text{F}_6$  in the presence of  $\text{Et}_3\text{SiH}$  and 4-(dimethylamino)pyridine using 5 mol% **2** at 50  $^\circ\text{C}$  in  $d_8$ -THF. Fluorobenzene ( $\text{C}_6\text{H}_5\text{F}$ ) at  $\delta$  -113.2 is used as the internal standard (0.462 M, 0.237 mmol). Negligible amounts of the defluorinated product  $\text{C}_6\text{F}_5\text{H}$  were formed (282 MHz,  $d_8$ -THF, 25  $^\circ\text{C}$ ).

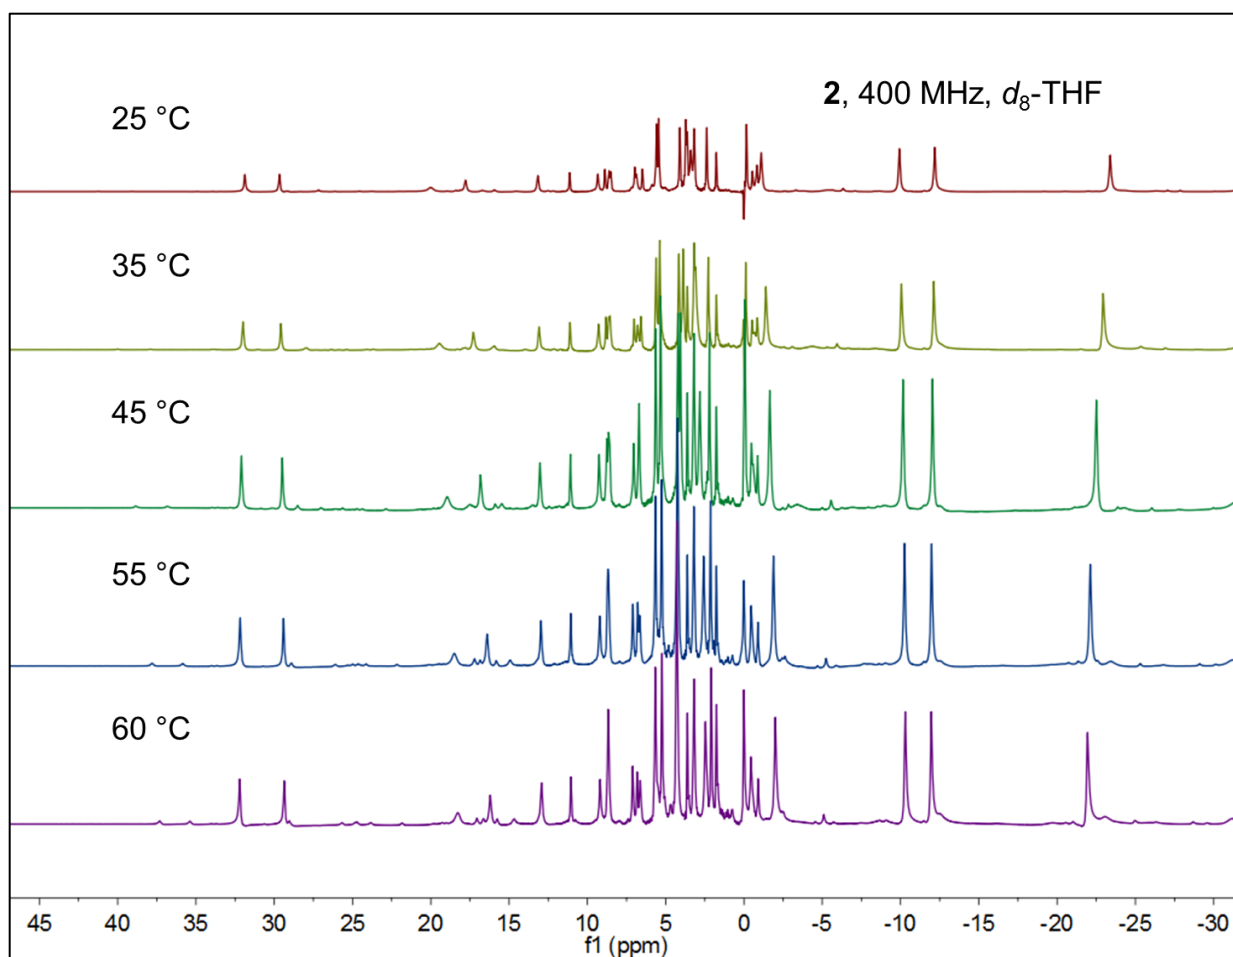

**Figure S38:** Stacked variable temperature for a *d*<sub>8</sub>-THF solution of the dimeric iron hydride **2**. There is not an appreciable difference in the spectra across the various temperatures recorded (see **Figure S39** for a more detailed perspective).

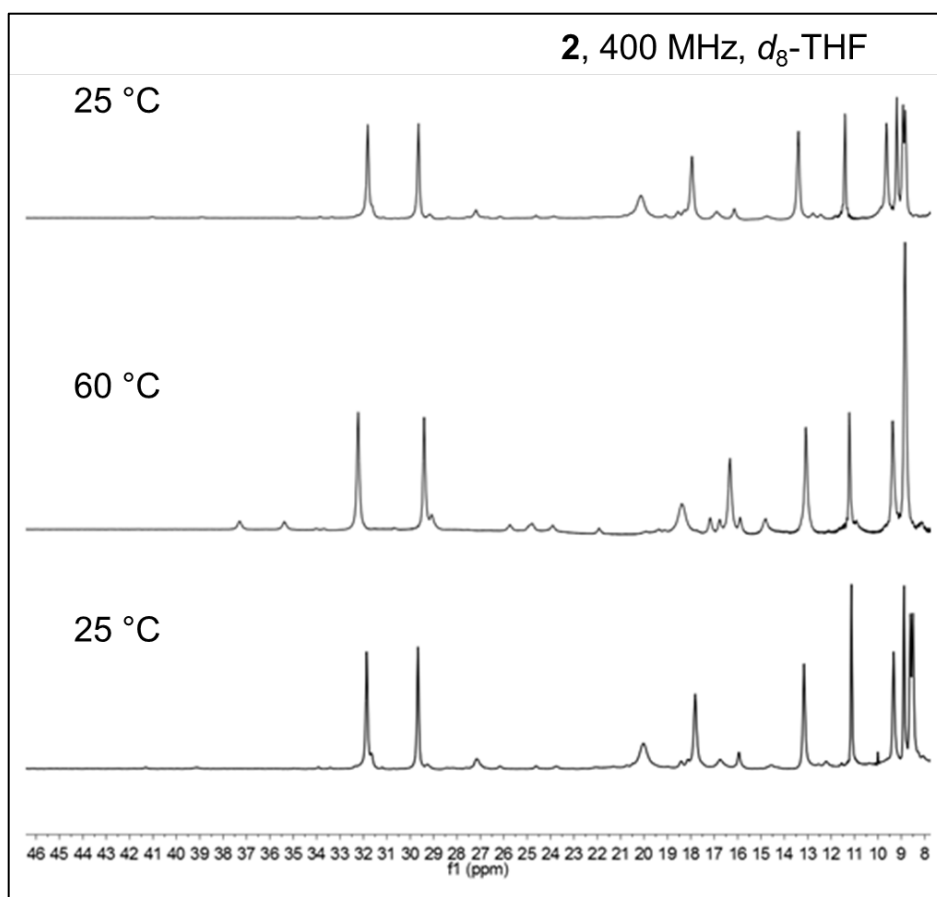

**Figure S39:** Stacked variable temperature for a *d*<sub>8</sub>-THF solution of the dimeric iron hydride **2**. This zoomed-in region shows a new set of resonances that appear at δ 37.3 and 35.4 at 60 °C. These same signals disappear upon cooling the NMR sample to 25 °C. The reversibility of signal appearance/disappearance gives support to the hypothesis that increased temperatures cause a shift in the dimer/monomer equilibrium of **2** to shift to slight monomer production at elevated temperature.

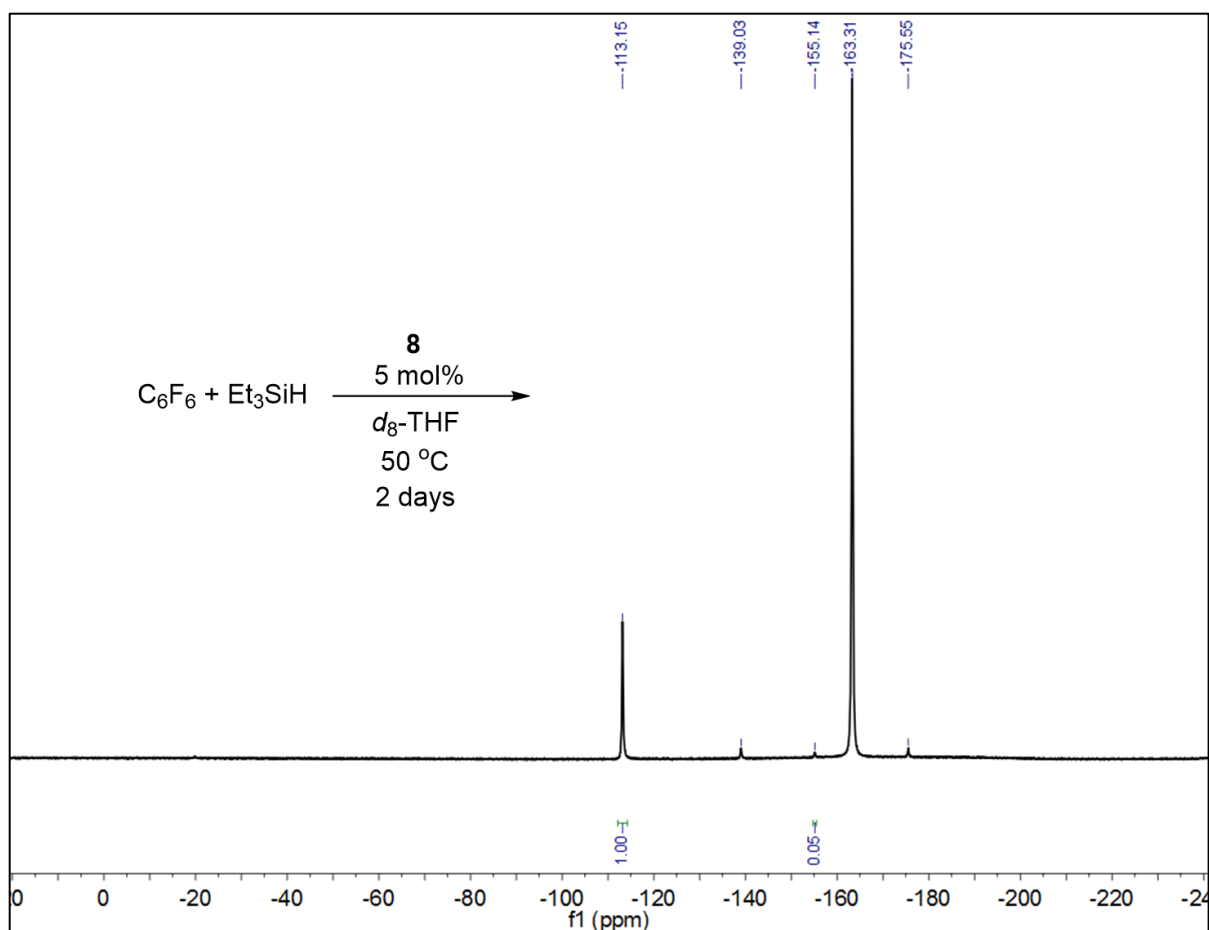

**Figure S40:** <sup>19</sup>F NMR spectrum for the final time point after 2 days for the attempted monodefluorination of C<sub>6</sub>F<sub>6</sub> in the presence of Et<sub>3</sub>SiH using 5 mol% **8** at 50 °C in *d*<sub>8</sub>-THF. Fluorobenzene (C<sub>6</sub>H<sub>5</sub>F) at δ -113.2 is used as the internal standard (0.462 M, 0.295 mmol). The <sup>19</sup>F resonance corresponding to the *para* position of pentafluorobenzene (C<sub>6</sub>F<sub>5</sub>H) at δ -155.1 was used for integration purposes (TON=0.8). A relaxation delay of 50 seconds was used between scans in the <sup>19</sup>F NMR experiment (282 MHz, *d*<sub>8</sub>-THF, 25 °C).

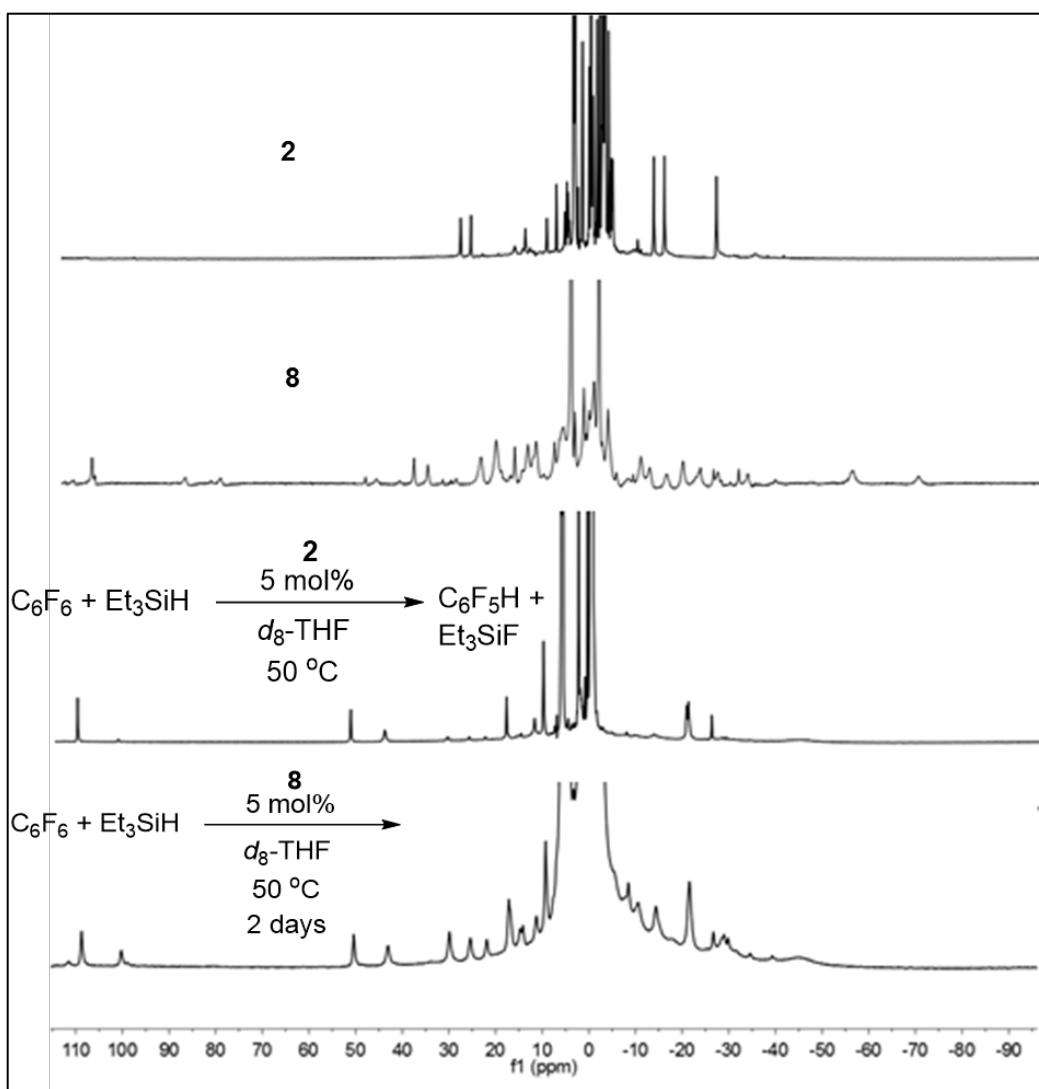

**Figure S41:** A comparison of the  $^1\text{H}$  NMR spectra for **2**, **8**, and the final time points for the HDF catalytic runs using **2** and **8** as precatalysts. The resting state during catalysis is not the hydride species **2** or the fluoride species **8**. All spectra collected in  $d_8$ -THF at 300 MHz at 25  $^\circ\text{C}$ .

## Additional Kinetic Data

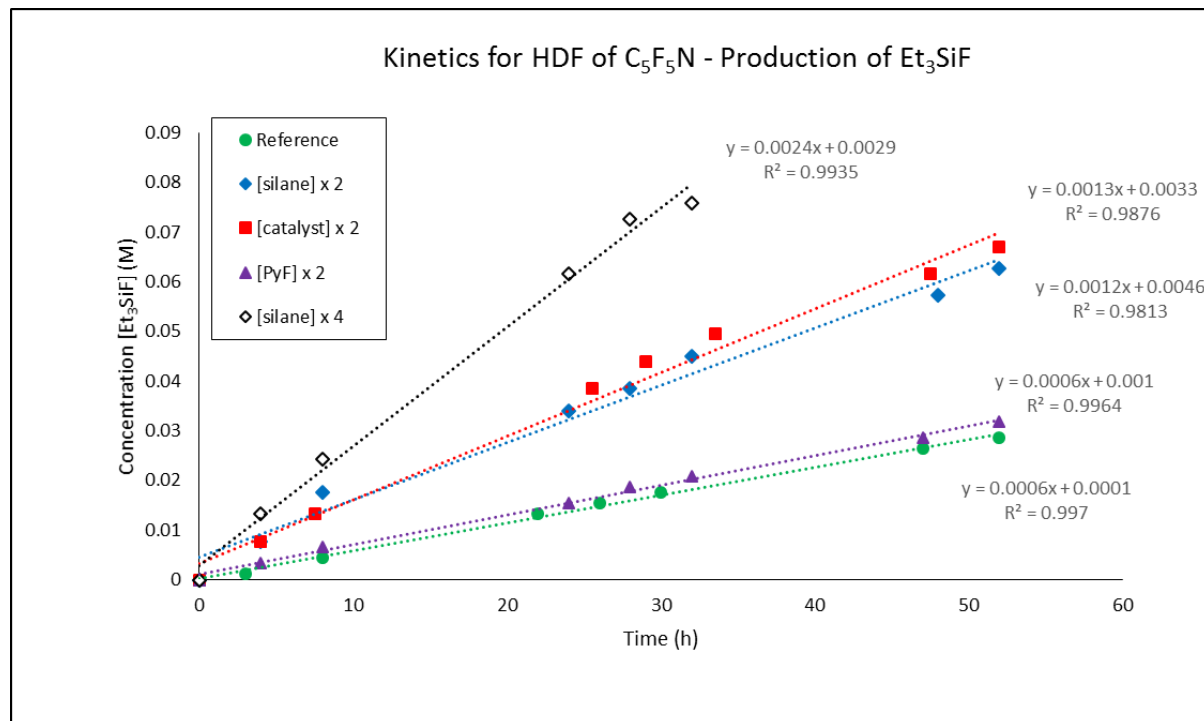

**Figure S42:** Kinetic evaluation for the production of  $Et_3SiF$  during the hydrodefluorination of pentafluoropyridine. The trials shown in the above figure are from the same conditions outlined in the main text (reference:  $[silane]=[PyF]=0.11$  M,  $[Fe]=5.5 \times 10^{-3}$  M using  $d_8$ -THF at  $50^\circ C$ ).
